# Supplementary material for: Switching between porphyrin, porphodimethene and porphyrinogen using cyanide and fluoride ions mimicking volatile molecular memory and the ‘NOR’ logic gate
Source: Royal Society of Chemistry journal article supplement (doi:10.1039/c6dt02506d), 2016-01-01
Supplement: c6dt02506d1.pdf [file c6dt02506d1.pdf]

## Electronic Supplementary Information (ESI) for Switching between Porphyrin, Porphodimethene and Porphyrinogen using Cyanide and Fluoride ions mimicking Volatile Molecular Memory and 'NOR' Logic Gate

Mandeep K. Chahal and Muniappan Sankar

*Department of Chemistry, Indian Institute of Technology Roorkee, Roorkee-247667, India*

### Table of Contents

|                                                                                                                                                                                                                               | Page No |
|-------------------------------------------------------------------------------------------------------------------------------------------------------------------------------------------------------------------------------|---------|
| <b>Scheme S1.</b> Multigram scale preparation of $\beta$ -formyl substituted porphyrins.                                                                                                                                      | 3       |
| <b>Scheme S2.</b> Synthetic procedure for targeted porphyrins <b>1</b> , <b>2</b> and <b>3</b> .                                                                                                                              | 3       |
| <b>Figure S1.</b> MALDI-TOF mass spectrum of Cu-TDtBHPP-CHO.                                                                                                                                                                  | 4       |
| <b>Figure S2.</b> $^1\text{H}$ NMR spectrum of Ni-TDtBHPP-CHO.                                                                                                                                                                | 4       |
| <b>Figure S3.</b> $^{13}\text{C}$ NMR spectrum of Ni-TDtBHPP-CHO.                                                                                                                                                             | 5       |
| <b>Figure S4.</b> MALDI-TOF mass spectrum of Ni-TDtBHPP-CHO.                                                                                                                                                                  | 5       |
| <b>Figure S5.</b> MALDI-TOF mass spectrum of Cu-TDtBHPP-MN ( <b>1</b> ).                                                                                                                                                      | 6       |
| <b>Figure S6.</b> $^1\text{H}$ NMR spectrum of Ni-TDtBHPP-MN ( <b>2</b> ).                                                                                                                                                    | 6       |
| <b>Figure S7.</b> $^{13}\text{C}$ NMR spectrum of Ni-TDtBHPP-MN ( <b>2</b> ).                                                                                                                                                 | 7       |
| <b>Figure S8.</b> MALDI-TOF mass spectrum of Ni-TDtBHPP-MN ( <b>2</b> ).                                                                                                                                                      | 7       |
| <b>Figure S9.</b> $^1\text{H}$ NMR spectrum of $\text{H}_2$ -TDtBHPP-MN ( <b>3</b> ).                                                                                                                                         | 8       |
| <b>Figure S10.</b> $^{13}\text{C}$ NMR spectrum of $\text{H}_2$ -TDtBHPP-MN ( <b>3</b> ).                                                                                                                                     | 8       |
| <b>Figure S11.</b> MALDI-TOF mass spectrum of $\text{H}_2$ -TDtBHPP-MN ( <b>3</b> ).                                                                                                                                          | 9       |
| <b>Figure S12.</b> UV/Vis titration of $\text{CN}^-$ ( $0 - 9.32 \times 10^{-5}$ M) to Cu-TDtBHPP-MN ( <b>1</b> ) ( $8 \mu\text{M}$ ).                                                                                        | 11      |
| <b>Figure S13.</b> UV/Vis titration of $\text{CN}^-$ ( $0 - 9.32 \times 10^{-5}$ M) to Ni-TDtBHPP-MN ( <b>2</b> ) ( $8 \mu\text{M}$ ).                                                                                        | 11      |
| <b>Figure S14.</b> $^1\text{H}$ NMR spectra of the adduct $[\mathbf{2} \cdot \text{CN}]^-$ after addition of $\text{CN}^-$ ions (1 equiv.) to Ni-TDtBHPP-MN ( <b>2</b> ) ( $5 \times 10^{-3}$ M) in $\text{CDCl}_3$ at 298 K. | 12      |
| <b>Figure S15.</b> Cyclic voltammetric traces of Cu-TDtBHPP-MN( <b>1</b> ) (left) and Ni-TDtBHPP-MN( <b>2</b> ) (right) in absence and presence of $\text{CN}^-$ ions containing 0.1 M TBAPF <sub>6</sub> at 298 K.           | 12      |
| <b>Figure S16.</b> UV/Vis titration of $\text{F}^-$ ( $0 - 10^{-3}$ M) to Ni-TDtBHPP-MN ( <b>2</b> ) ( $8 \mu\text{M}$ ) changing porphyrin to porphodimethene.                                                               | 13      |
| <b>Figure S17.</b> $^1\text{H}$ NMR spectra of <b>2</b> with increasing concentration of $\text{F}^-$ ions (0-10 equiv.) in $\text{CDCl}_3$ , 500 MHz.                                                                        | 13      |
| <b>Figure S18.</b> Cyclic voltammetric traces of Cu-TDtBHPP-MN( <b>1</b> ) (left) and Ni-TDtBHPP-MN( <b>2</b> ) (right) in absence and presence of $\text{F}^-$ ions containing 0.1 M TBAPF <sub>6</sub> at 298 K.            | 14      |
| <b>Figure S19.</b> UV/Vis titration of $\text{F}^-$ ( $0 - 4 \times 10^{-3}$ M) to (Ni-TDtBHPP-MN + $\text{CN}^-$ ) ( $6 \mu\text{M}$ ) changing anionic porphyrin to anionic porphodimethene.                                | 14      |
| <b>Figure S20.</b> Absorption spectra and colorimetric changes for Cu-TDtBHPP-MN ( <b>1</b> ) ( $8 \mu\text{M}$ ) in the presence of different anions. Changes observed only for $\text{F}^-$ and $\text{CN}^-$ ions.         | 15      |
| <b>Figure S21.</b> Absorption spectra and colorimetric changes for Ni-TDtBHPP-MN ( <b>2</b> ) ( $8 \mu\text{M}$ ) in the presence of different anions. Changes observed only for $\text{F}^-$ and $\text{CN}^-$ ions.         | 15      |
| <b>Figure S22.</b> Visual response for reversibility for $\text{F}^-$ ions (left) and UV/Vis response for reversibility for                                                                                                   | 16      |

|                                                                                                                                                                                                                                                                                                                                               |    |
|-----------------------------------------------------------------------------------------------------------------------------------------------------------------------------------------------------------------------------------------------------------------------------------------------------------------------------------------------|----|
| F <sup>-</sup> ions in case of <b>1</b> (right) (metalloporphyrin spectrum regenerated with marginal shift in Qx(0,0) band).                                                                                                                                                                                                                  |    |
| <b>Figure S23.</b> Visual response for reversibility for F <sup>-</sup> ions (left) and UV/Vis response for reversibility for F <sup>-</sup> ions in case of <b>2</b> (right) (distortion in Q bands are more probably due to autoxidation).                                                                                                  | 16 |
| <b>Figure S24.</b> (a) UV/Vis response for reversibility for F <sup>-</sup> ions using trifluoroacetic acid (TFA) in case of Cu-TDtBHPP-MN ( <b>1</b> ). (b) UV/Vis response for reversibility for F <sup>-</sup> ions using CH <sub>3</sub> OH in case of Cu-TDtBHPP-MN ( <b>1</b> ).                                                        | 17 |
| <b>Figure S25.</b> Effect of water on anionic porphyrin formed after the addition of cyanide ions to Ni-TDtBHPP-MN ( <b>2</b> ).                                                                                                                                                                                                              | 17 |
| <b>Figure S26.</b> (a) Electronic absorbance changes upon addition of CN <sup>-</sup> (0-2.5×10 <sup>-4</sup> M) (b) Fluorescence emission intensity changes upon addition of CN <sup>-</sup> (0-2×10 <sup>-4</sup> M) into <b>3</b> in CH <sub>2</sub> Cl <sub>2</sub> (conversion of porphyrin to anionic porphyrin).                       | 18 |
| <b>Figure S27.</b> (a) Electronic absorbance changes upon addition of F <sup>-</sup> (0-9.5×10 <sup>-4</sup> M) and (b) fluorescence emission intensity changes upon addition of F <sup>-</sup> (0-8.5×10 <sup>-4</sup> M) into <b>3</b> in CH <sub>2</sub> Cl <sub>2</sub> (conversion of porphyrin to porphyrinogen).                       | 18 |
| <b>Figure S28.</b> Fluorescence emission intensity changes of <b>3</b> for reversibility and reusability tests with F <sup>-</sup> ions (left) and their corresponding colorimetric response (right).                                                                                                                                         | 19 |
| <b>Figure S29.</b> UV-Visible spectral changes of <b>3</b> for reversibility and reusability tests with F <sup>-</sup> ions (left) and their corresponding colorimetric response (right).                                                                                                                                                     | 19 |
| <b>Figure S30.</b> (a) Electronic absorbance changes upon addition of F <sup>-</sup> (0-2.5×10 <sup>-3</sup> M) and (b) Fluorescence emission intensity changes upon addition of F <sup>-</sup> (0-2×10 <sup>-3</sup> M) into <b>5</b> in CH <sub>2</sub> Cl <sub>2</sub> (conversion of anionic porphyrin to anionic porphyrinogen).         | 20 |
| <b>Figure S31.</b> Fluorescence emission intensity changes of <b>5</b> with F <sup>-</sup> ions.                                                                                                                                                                                                                                              | 20 |
| <b>Figure S32.</b> UV-Visible spectral changes of <b>5</b> for reversibility and reusability tests with F <sup>-</sup> ions using L-ascorbic acid (left) and their corresponding Colorimetric response (right).                                                                                                                               | 20 |
| <b>Figure S33.</b> The “writing–erasing” cycle of <b>3</b> and <b>5</b> .                                                                                                                                                                                                                                                                     | 21 |
| <b>Figure S34.</b> Repeated memory cycles using <b>1A</b> (left) and <b>1B</b> (right) in which one state was detected by the absorbance for porphyrin and other state by the absorbance for porphodimethene in CH <sub>2</sub> Cl <sub>2</sub> for Cu-TDtBHPP-MN( <b>1</b> ). Photographs showed the colour of each state under ‘naked-eye’. | 22 |
| <b>Figure S35.</b> Repeated memory cycles using <b>1A</b> (left) and <b>1B</b> (right) in which one state was detected by the absorbance for porphyrin and other state by the absorbance for porphodimethene in CH <sub>2</sub> Cl <sub>2</sub> for Ni-TDtBHPP-MN( <b>2</b> ). Photographs showed the colour of each state under ‘naked-eye’. | 22 |
| <b>Figure S36.</b> (a) Electronic absorbance and (b) fluorescence emission intensity changes upon addition of 10 equivalents of different tetra- <i>n</i> -butylammonium salts into CH <sub>2</sub> Cl <sub>2</sub> solution of <b>3</b> .                                                                                                    | 23 |
| <b>Figure S37.</b> Analytical calibration curve using a simple liner curve fit, with error estimation of Cu-TDtBHPP-MN ( <b>1</b> ) for fluoride addition.                                                                                                                                                                                    | 23 |
| <b>Figure S38.</b> Analytical calibration curve using a simple liner curve fit, with error estimation of Cu-TDtBHPP-MN ( <b>1</b> ) for cyanide addition.                                                                                                                                                                                     | 24 |
| <b>Figure S39.</b> Analytical calibration curve using a simple liner curve fit, with error estimation of H <sub>2</sub> -TDtBHPP-MN ( <b>3</b> ) for cyanide addition.                                                                                                                                                                        | 25 |
| <b>Figure S40.</b> Analytical calibration curve using a simple liner curve fit, with error estimation of H <sub>2</sub> -TDtBHPP-MN ( <b>3</b> ) for fluoride addition.                                                                                                                                                                       | 26 |
| <b>Figure S41.</b> Coefficients of the first HOMO and the first LUMO for the optimized H <sub>2</sub> -TDtBHPP, <b>3</b> , <b>5</b> , <b>4.2F<sup>-</sup></b> , <b>4</b> and <b>6.2F<sup>-</sup></b> .                                                                                                                                        | 28 |
| <b>Table S1.</b> Crystal data of Cu-TDtBHPP-CHO.                                                                                                                                                                                                                                                                                              | 9  |

|                                                                                                                                                                     |    |
|---------------------------------------------------------------------------------------------------------------------------------------------------------------------|----|
| <b>Table S2.</b> Optical absorption spectral data of synthesized porphyrins in CH <sub>2</sub> Cl <sub>2</sub> at 298 K.                                            | 10 |
| <b>Table S3.</b> Electrochemical Redox Data (vs Ag/AgCl) of synthesized porphyrins in CH <sub>2</sub> Cl <sub>2</sub> Containing 0.1 M TBAPF <sub>6</sub> at 298 K. | 10 |
| <b>Table S4.</b> B3LYP/LANL2DZ calculated parameters for the investigated porphyrin and porphyrinogen for <b>1</b> .                                                | 27 |
| <b>Table S5.</b> B3LYP/LANL2DZ calculated parameters for the investigated porphyrin and porphodimethene for <b>2</b> .                                              | 27 |
| <b>Table S6.</b> Tunable two-input/multi-output system for <b>1</b> using CN <sup>-</sup> and F <sup>-</sup> as inputs.                                             | 29 |
| <b>Table S7.</b> Tunable two-input/multi-output system for <b>2</b> using CN <sup>-</sup> and F <sup>-</sup> as inputs.                                             | 29 |

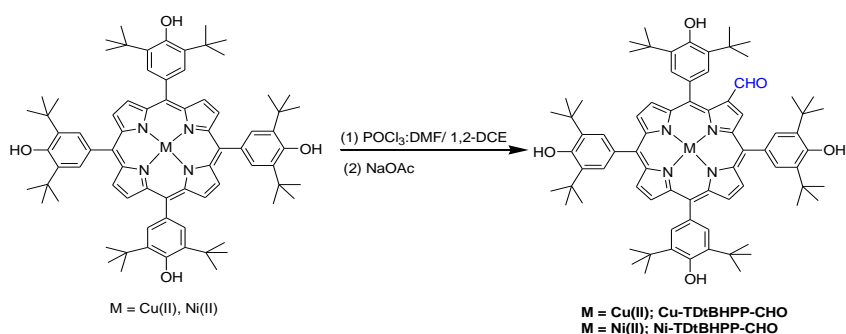

**Scheme S1.** Multigram scale preparation of  $\beta$ -formyl substituted porphyrins.

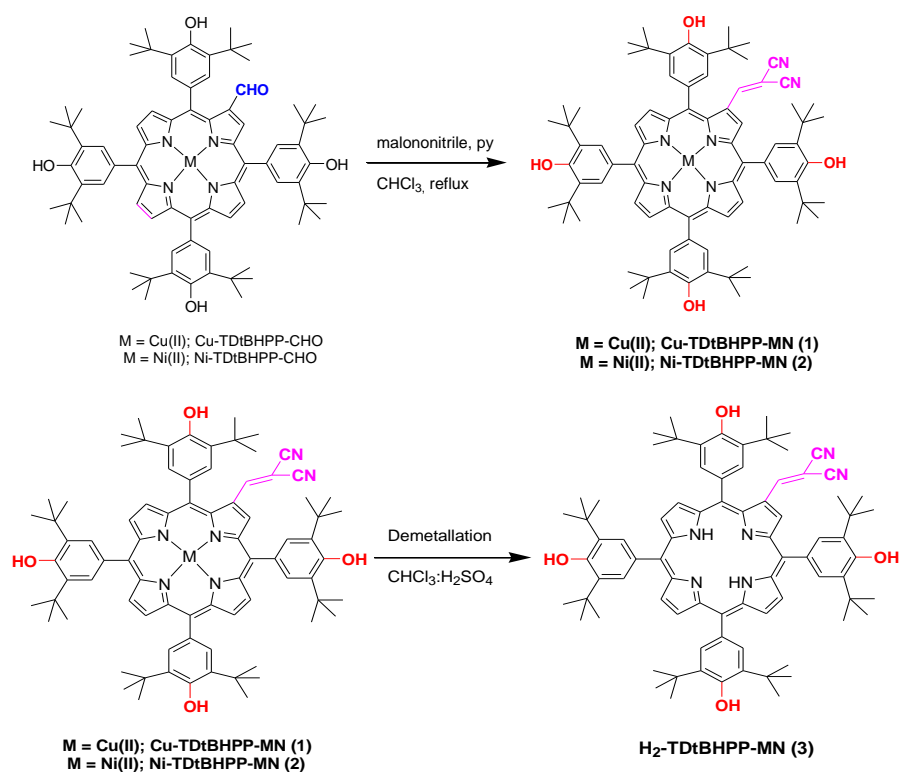

**Scheme S2.** Synthetic procedure for targeted porphyrins **1**, **2** and **3**.

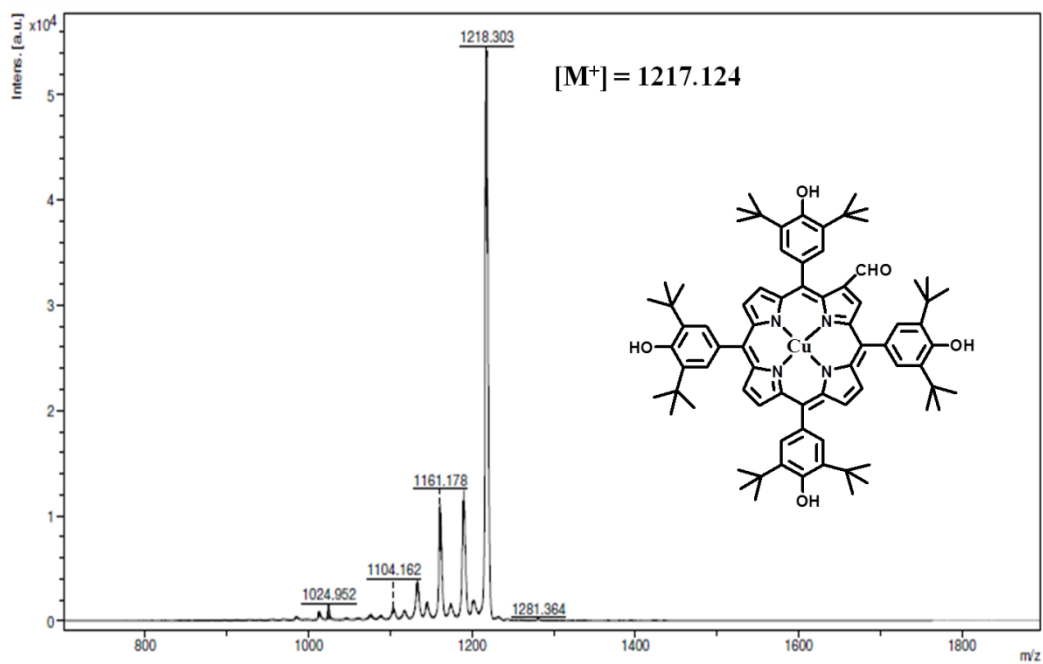

**Figure S1.** MALDI-TOF mass spectrum of Cu-TDtBHPP-CHO.

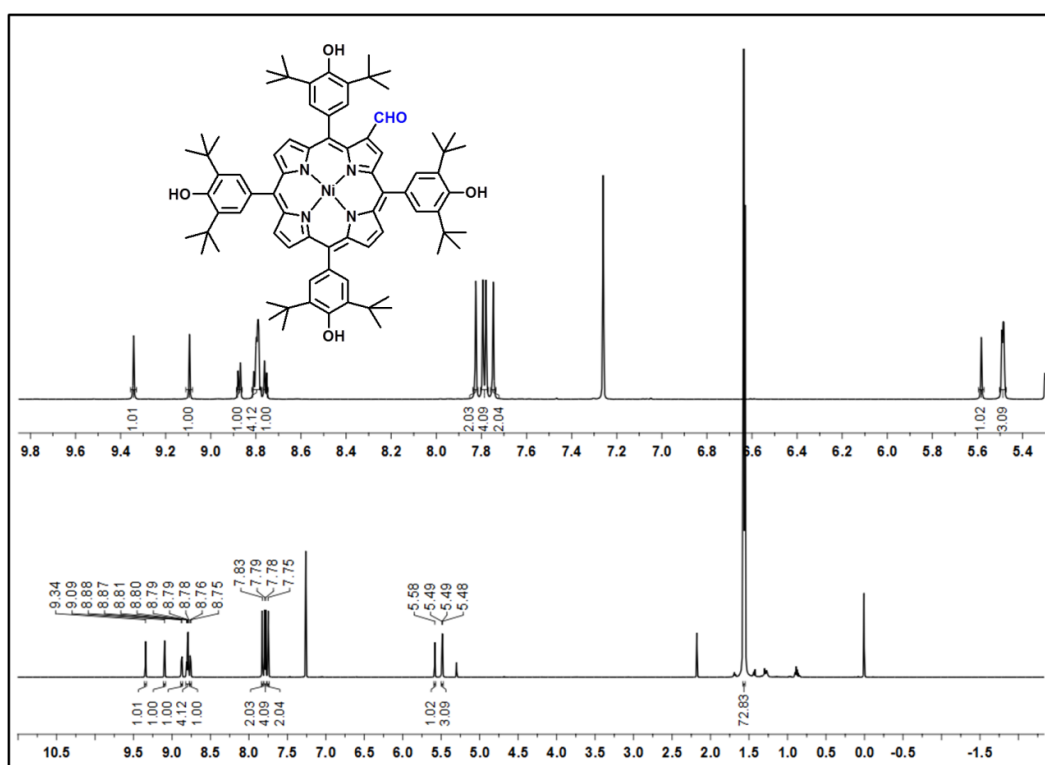

**Figure S2.**  $^1\text{H}$  NMR spectrum of Ni-TDtBHPP-CHO.

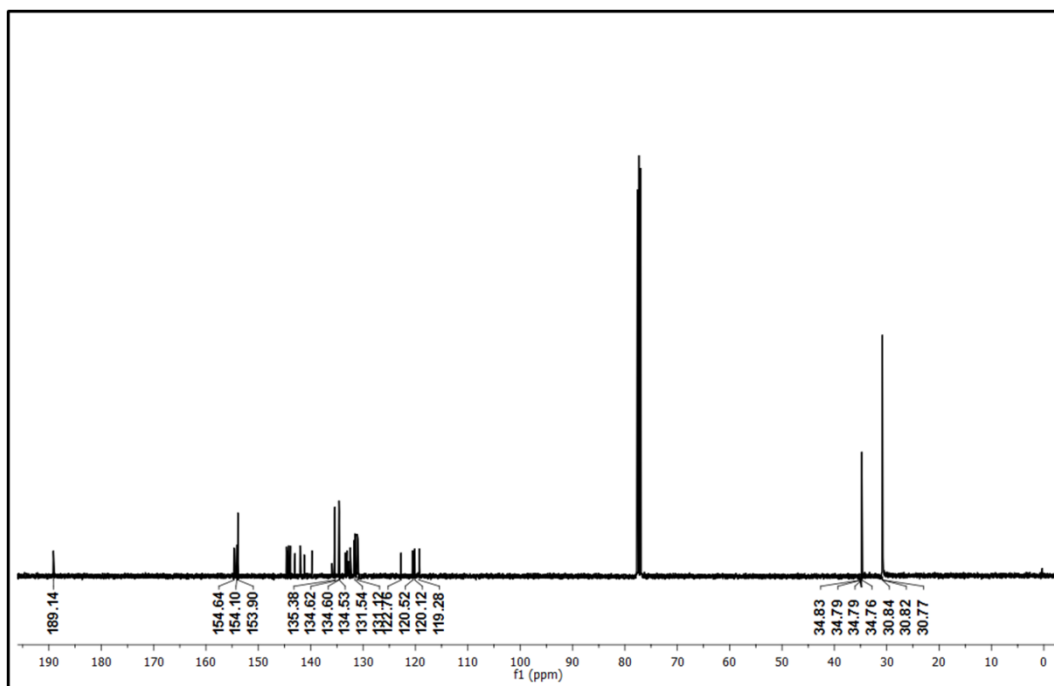

**Figure S3.**  $^{13}\text{C}$  NMR spectrum of Ni-TDtBHPP-CHO.

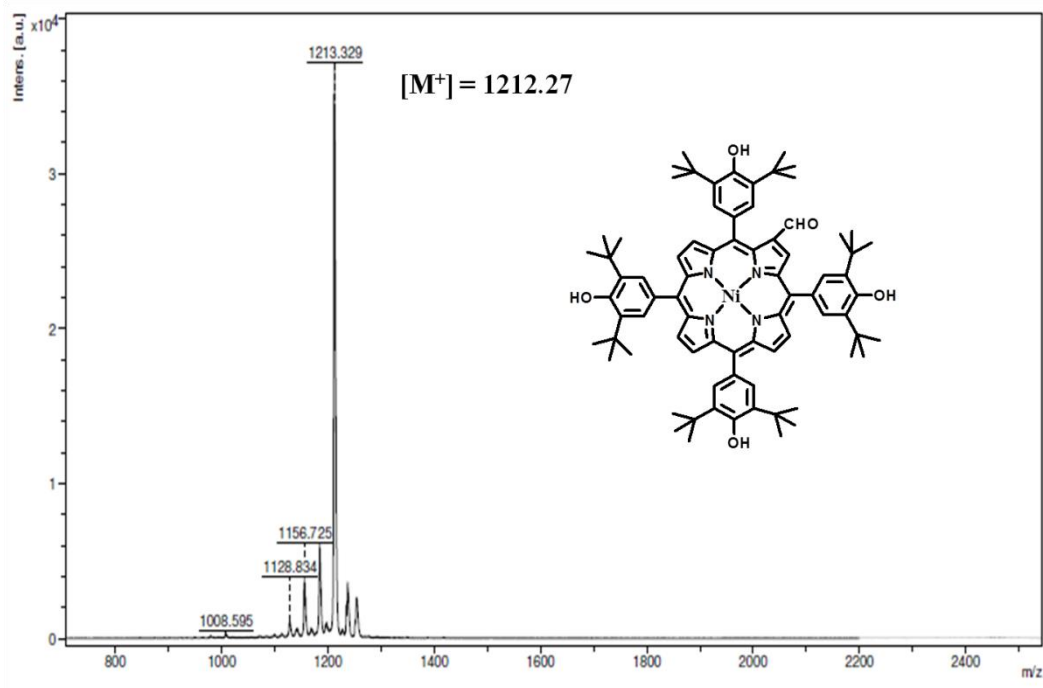

**Figure S4.** MALDI-TOF mass spectrum of Ni-TDtBHPP-CHO.

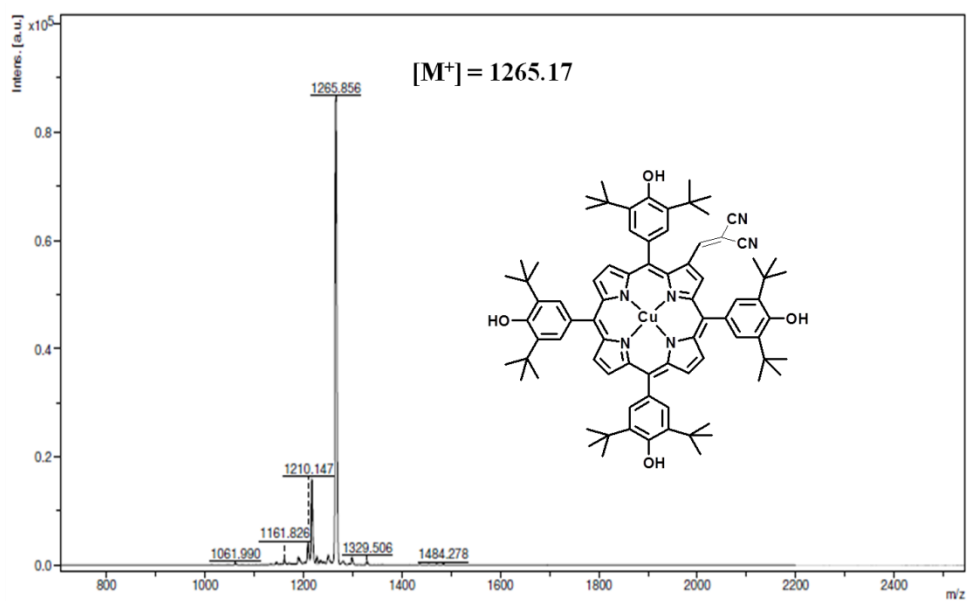

Figure S5. MALDI-TOF mass spectrum of Cu-TDtBHP-MN (1).

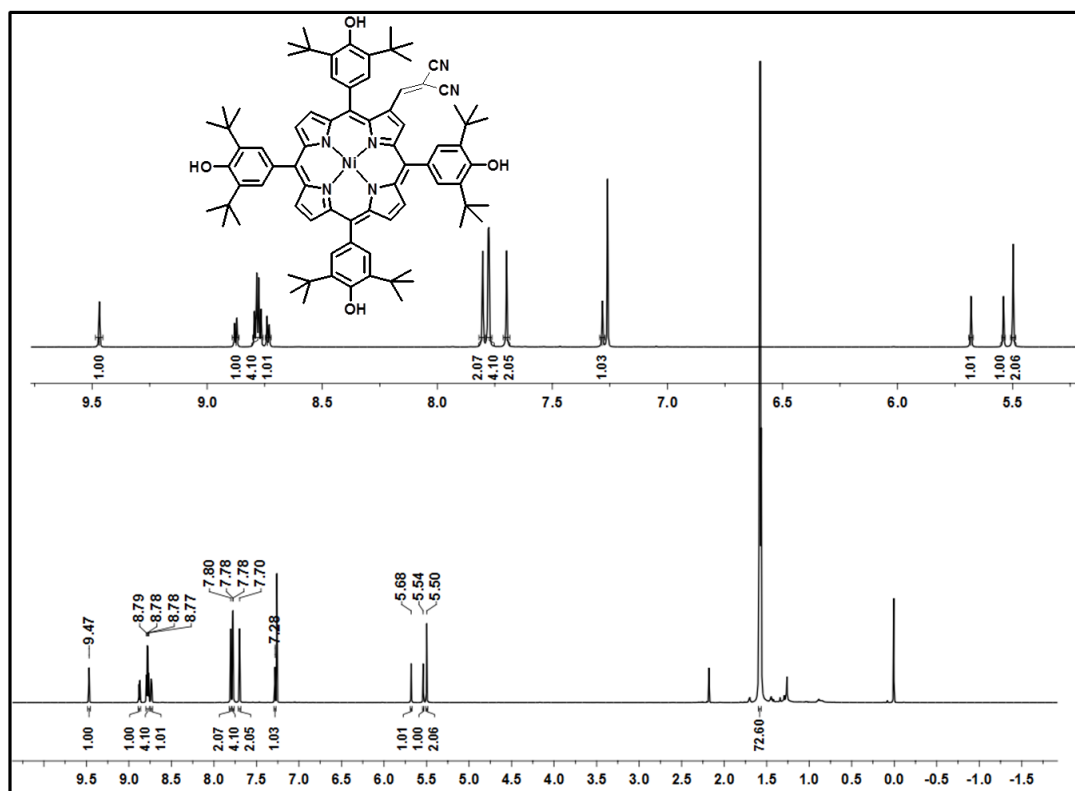

Figure S6.  $^1\text{H}$  NMR spectrum of Ni-TDtBHP-MN (2).

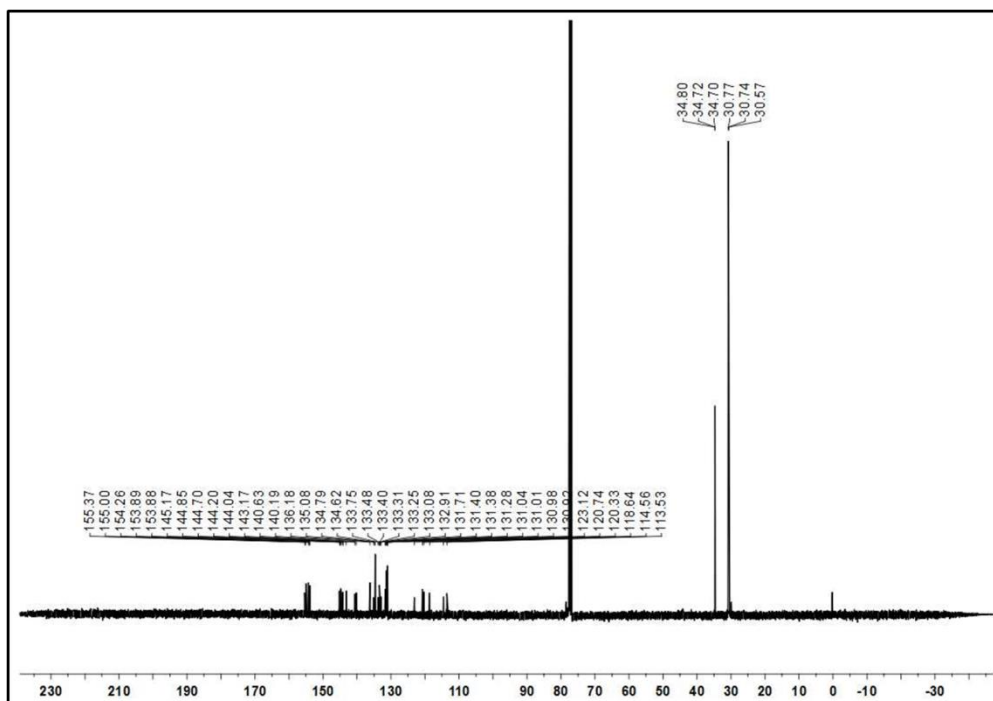

**Figure S7.**  $^{13}\text{C}$  NMR spectrum of Ni-TDtBHPP-MN (**2**).

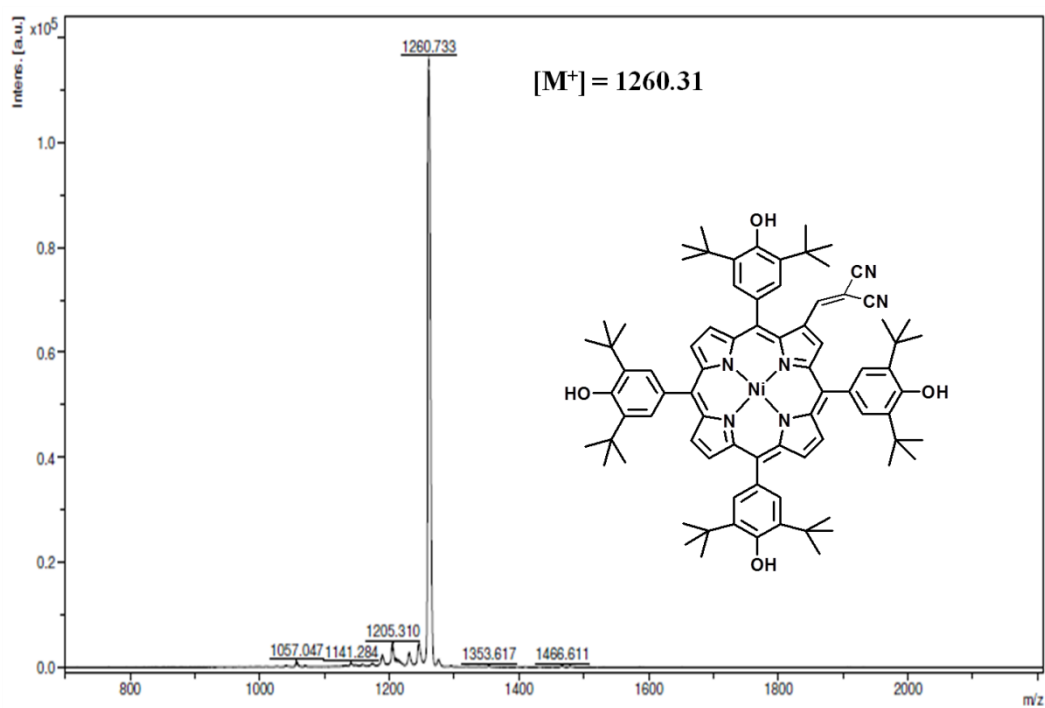

**Figure S8.** MALDI-TOF mass spectrum of Ni-TDtBHPP-MN (**2**).

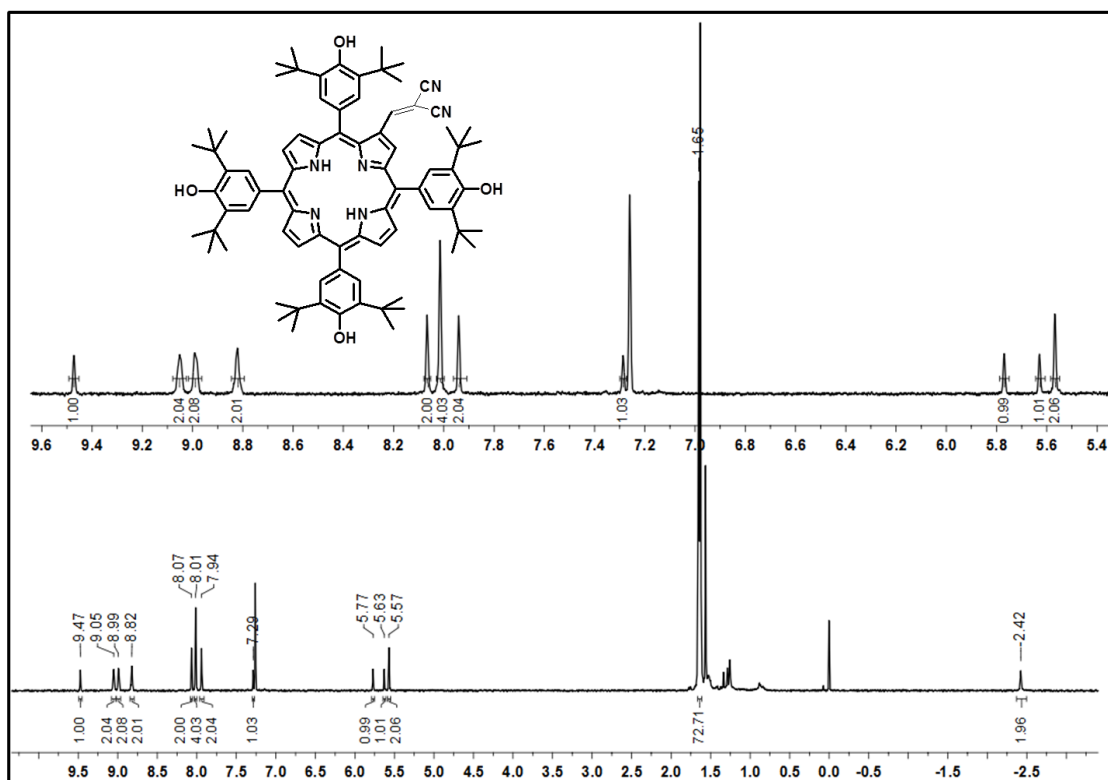

Figure S9.  $^1H$  NMR spectrum of  $H_2$ -TDtBHPP-MN (3).

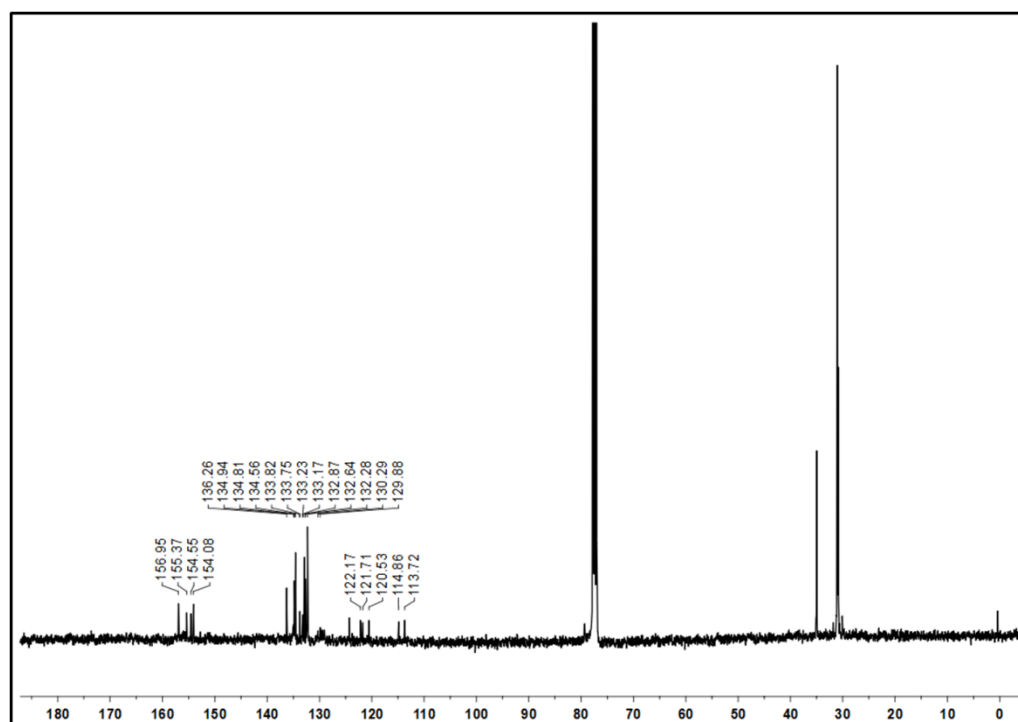

Figure S10.  $^{13}C$  NMR spectrum of  $H_2$ -TDtBHPP-MN (3).



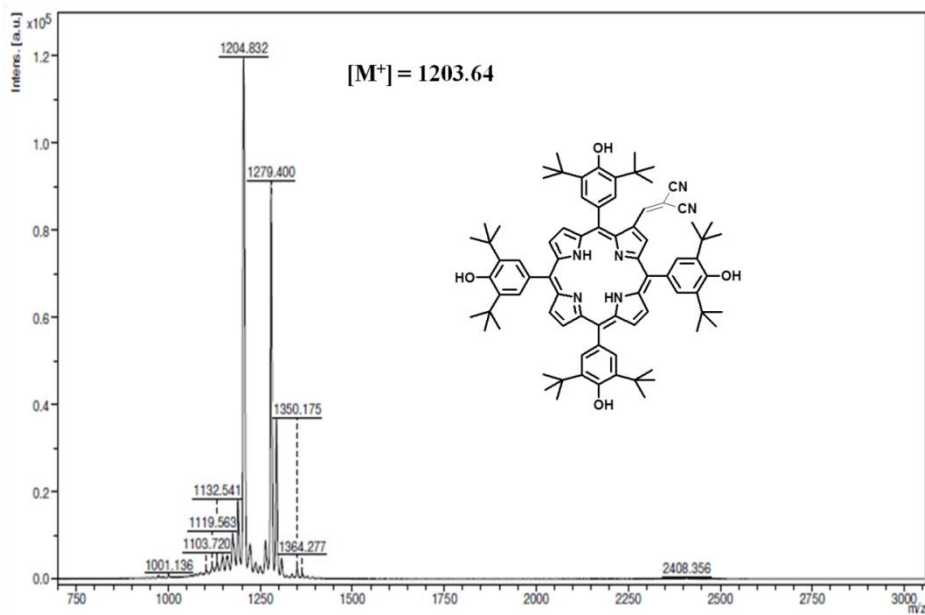

**Figure S11.** MALDI-TOF mass spectrum of H<sub>2</sub>-TDtBHPP-MN (**3**).

**Table S1.** Crystal data of Cu-TDtBHPP-CHO

|                                        |                                                                   |
|----------------------------------------|-------------------------------------------------------------------|
| Empirical formula                      | C <sub>83</sub> H <sub>105</sub> N <sub>4</sub> O <sub>5</sub> Cu |
| Formula Weight                         | 1303.26                                                           |
| Crystal system                         | Triclinic                                                         |
| Space group                            | P-1                                                               |
| a (Å)                                  | 10.8479(4)                                                        |
| b (Å)                                  | 14.6207(5)                                                        |
| c (Å)                                  | 15.9745(5)                                                        |
| $\alpha$ (°)                           | 70.078(2)                                                         |
| $\beta$ (°)                            | 76.389(2)                                                         |
| $\gamma$ (°)                           | 68.533(2)                                                         |
| Volume (Å <sup>3</sup> )               | 2198.97(13)                                                       |
| Z                                      | 1                                                                 |
| D <sub>calc</sub> (g/cm <sup>3</sup> ) | 0.984                                                             |
| Wavelength                             | 0.71073                                                           |
| Temperature (K)                        | 296 K                                                             |
| No. of total reflections               | 10936                                                             |
| No. of independent reflections         | 6457                                                              |
| R <sup>a</sup>                         | 0.0568                                                            |
| R <sub>w</sub> <sup>b</sup>            | 0.1609                                                            |
| CCDC                                   | 1451709                                                           |

**Table S2.** Optical absorption spectral data of synthesized porphyrins in CH<sub>2</sub>Cl<sub>2</sub> at 298 K.

| <b>Porphyrin</b>               | <b>B band(s), nm</b> | <b>Q band(s), nm</b> |
|--------------------------------|----------------------|----------------------|
| Ni-TDtBHPP                     | 422                  | 532                  |
| Cu-TDtBHPP                     | 422                  | 542, 581             |
| H <sub>2</sub> -TDtBHPP        | 425                  | 522,559,596,652      |
| Ni-TDtBHPP-CHO                 | 436                  | 545,586              |
| Cu-TDtBHPP-CHO                 | 435                  | 555,598              |
| Ni-TDtBHPP-MN (2)              | 393,462              | 554,613              |
| Cu-TDtBHPP-MN (1)              | 400,462              | 563,618              |
| H <sub>2</sub> -TDtBHPP-MN (3) | 415,464              | 541,625,689          |

**Table S3.** Electrochemical Redox Data (vs Ag/AgCl) of synthesized porphyrins in CH<sub>2</sub>Cl<sub>2</sub> containing 0.1 M TBAPF<sub>6</sub> at 298 K. Scan rate 0.1 Vs<sup>-1</sup>.

| <b>Porphyrin</b>               | <b>Oxidation(V)</b> |           | <b><math>\Delta E_{1/2}</math>(V)</b> | <b>Reduction(V)</b> |           |
|--------------------------------|---------------------|-----------|---------------------------------------|---------------------|-----------|
|                                | <b>I</b>            | <b>II</b> |                                       | <b>I</b>            | <b>II</b> |
| Ni-TDtBHPP                     | 0.87 <sup>a</sup>   |           | 2.24                                  | -1.370 <sup>a</sup> |           |
| Cu-TDtBHPP                     | 0.76                |           | 2.19                                  | -1.430              |           |
| Cu-TDtBHPP-CHO                 | 0.82                | 1.16      | 2.04                                  | -1.220              | -1.590    |
| Ni-TDtBHPP-CHO                 | 0.933               |           | 2.122                                 | -1.189              | -1.323    |
| Cu-TDtBHPP-MN (1)              | 0.864               | 1.242     | 1.850                                 | -0.987              | -1.300    |
| Ni-TDtBHPP-MN (2)              | 0.975               |           | 1.949                                 | -0.974              | -1.150    |
| H <sub>2</sub> -TDtBHPP-MN (3) | 0.989               |           | 1.878                                 | -0.889              |           |

$\Delta E_{1/2} = I_{\text{oxd.}} - I_{\text{red.}}$ . Pt working and Pt wire counter electrodes were used. <sup>a</sup>Data taken from DPV.

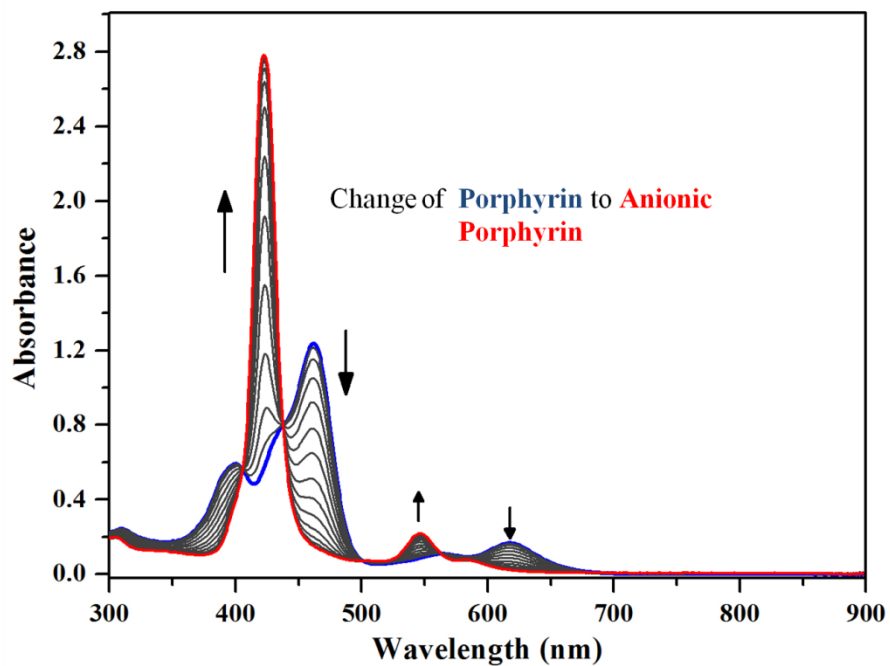

**Figure S12.** UV/Vis titration of  $\text{CN}^-$  (0 -  $9.32 \times 10^{-5}$  M) to Cu-TDtBHPP-MN (**1**) ( $8 \mu\text{M}$ ).

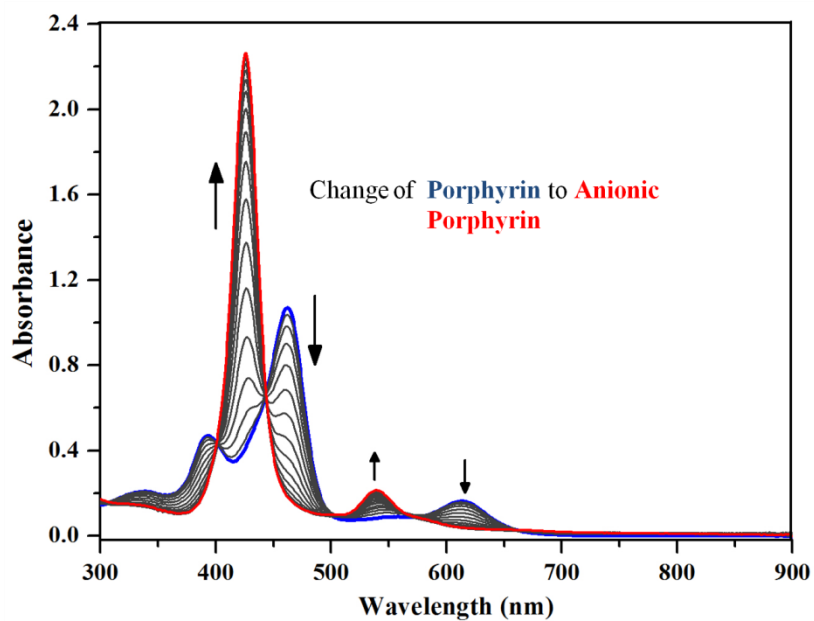

**Figure S13.** UV/Vis titration of  $\text{CN}^-$  (0 -  $9.32 \times 10^{-5}$  M) to Ni-TDtBHPP-MN (**2**) ( $8 \mu\text{M}$ ).

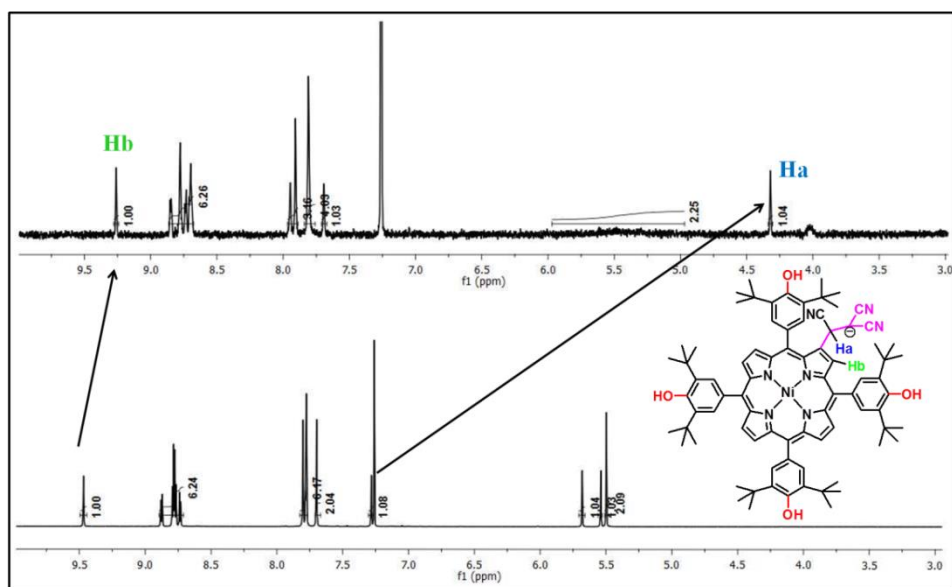

**Figure S14.**  $^1\text{H}$  NMR spectra of the adduct  $[\mathbf{2}\cdot\text{CN}]^-$  after addition of  $\text{CN}^-$  ions (1 equiv.) to Ni-TDtBHPP-MN ( $\mathbf{2}$ ) ( $5\times 10^{-3}$  M) in  $\text{CDCl}_3$  at 298 K.

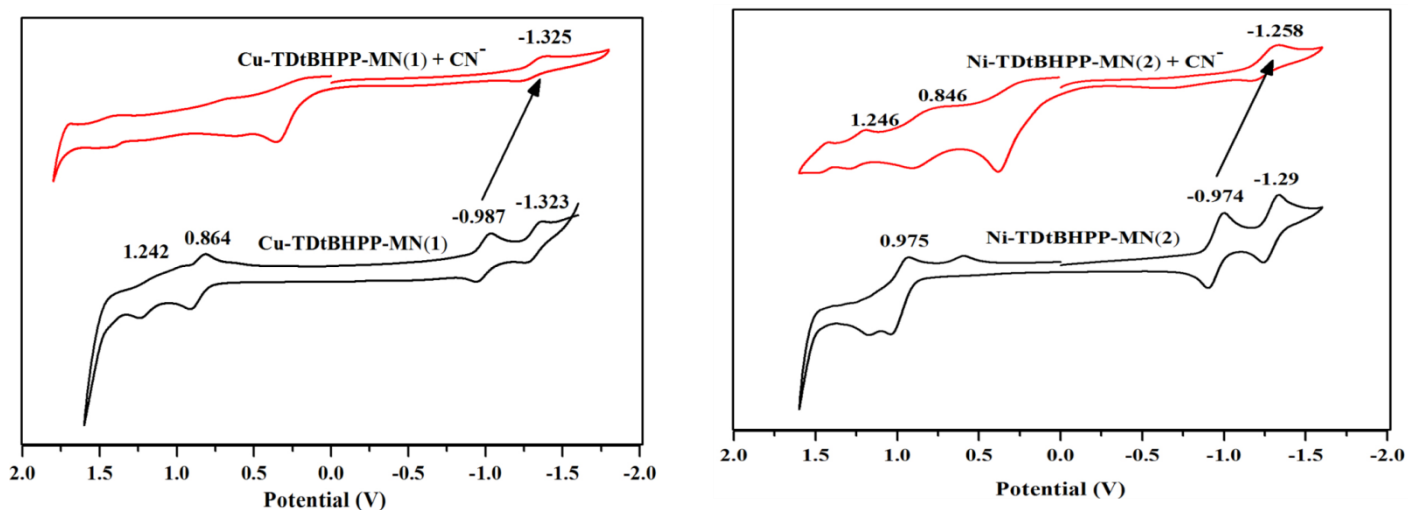

**Figure S15.** Cyclic voltammograms of Cu-TDtBHPP-MN ( $\mathbf{1}$ ) (left) and Ni-TDtBHPP-MN ( $\mathbf{2}$ ) (right) in absence and presence of  $\text{CN}^-$  ions containing 0.1 M TBAPF<sub>6</sub> at 298 K.

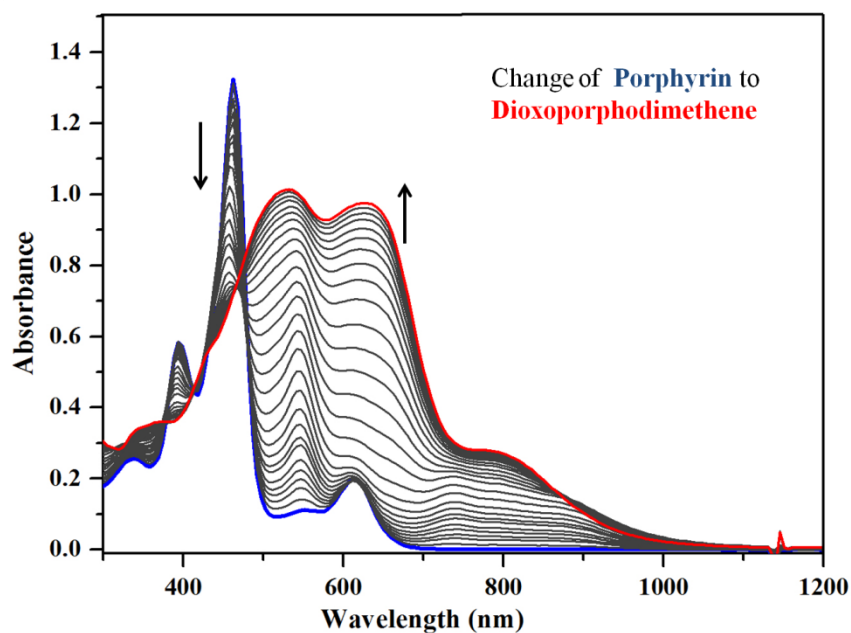

**Figure S16.** UV/Vis titration of  $F^-$  ( $0-10^{-3}$  M) to Ni-TDtBHP-MN (**2**) ( $8 \mu\text{M}$ ) changing porphyrin to porphodimethene.

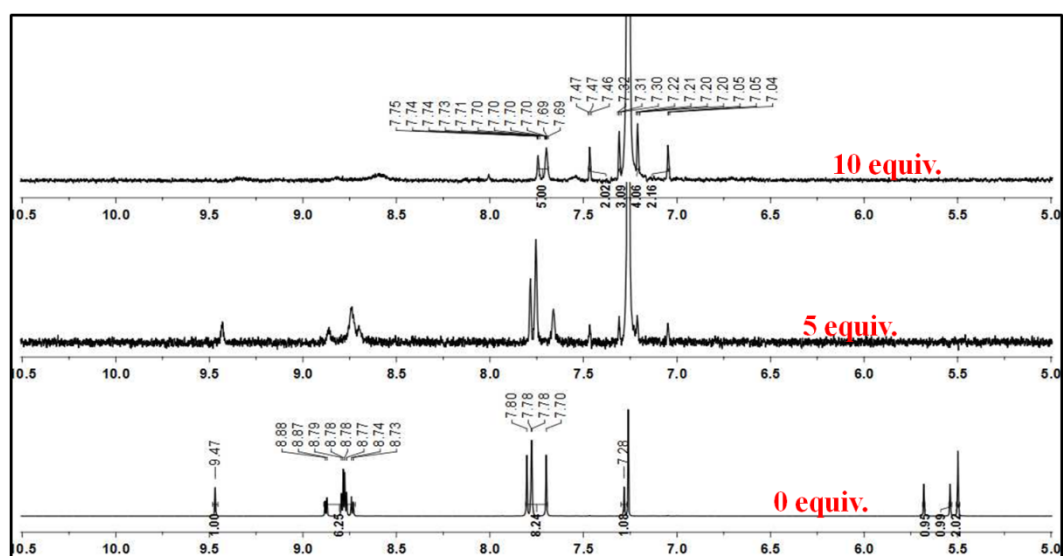

**Figure S17.**  $^1\text{H}$  NMR spectra of **2** with increasing concentration of  $F^-$  ions (0-10 equiv.) in  $\text{CDCl}_3$ , 500 MHz.

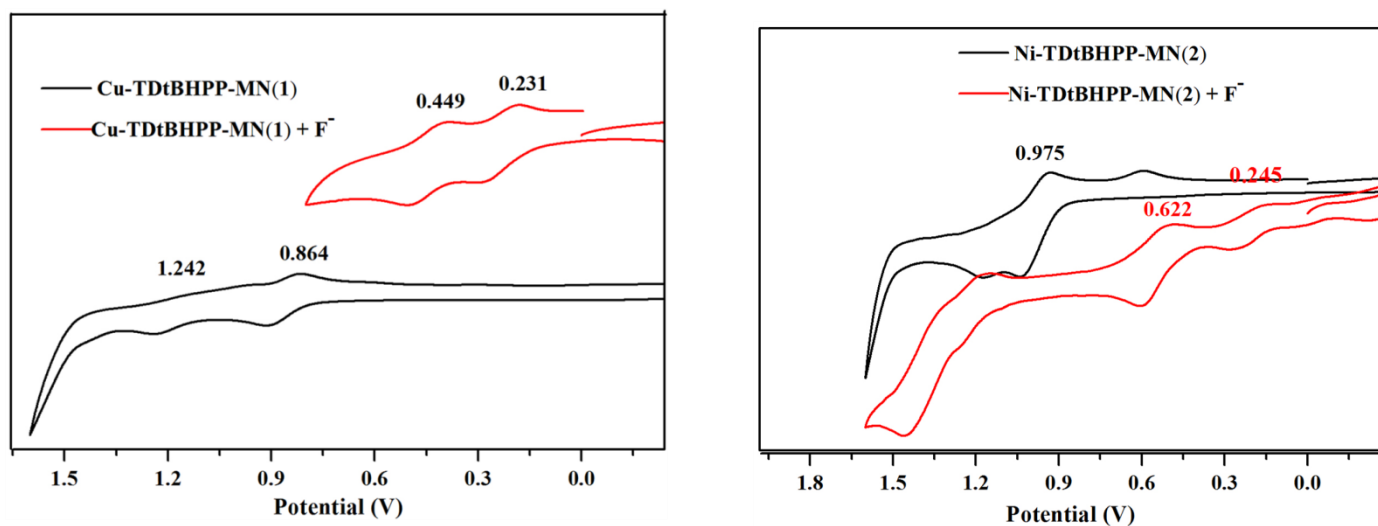

**Figure S18.** Cyclic voltammetric traces of Cu-TDtBHPP-MN (1) (left) and Ni-TDtBHPP-MN (2) (right) in absence and presence of F<sup>-</sup> ions containing 0.1 M TBAPF<sub>6</sub> at 298 K.

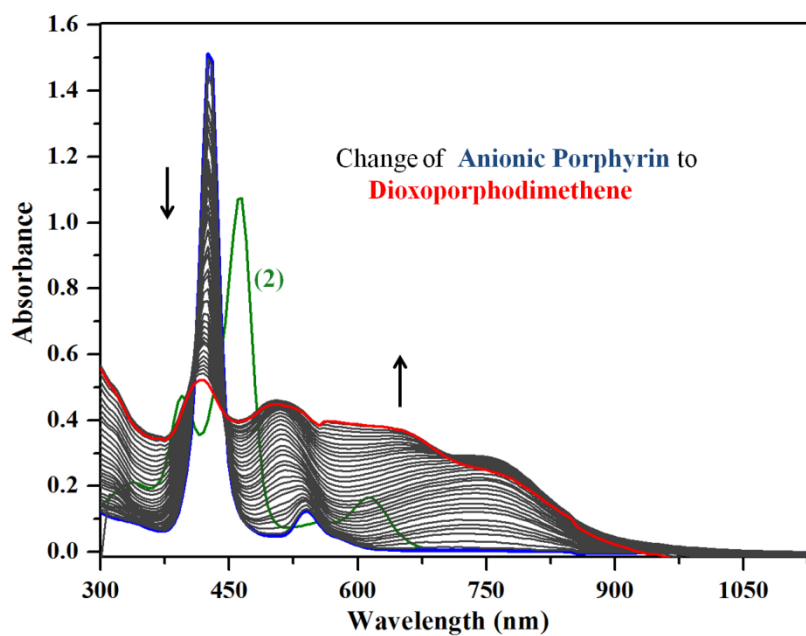

**Figure S19.** UV/Vis titration of F<sup>-</sup> (0–4×10<sup>-3</sup> M) to (Ni-TDtBHPP-MN + CN<sup>-</sup>) (6 μM) changing anionic porphyrin to anionic porphodimethene.

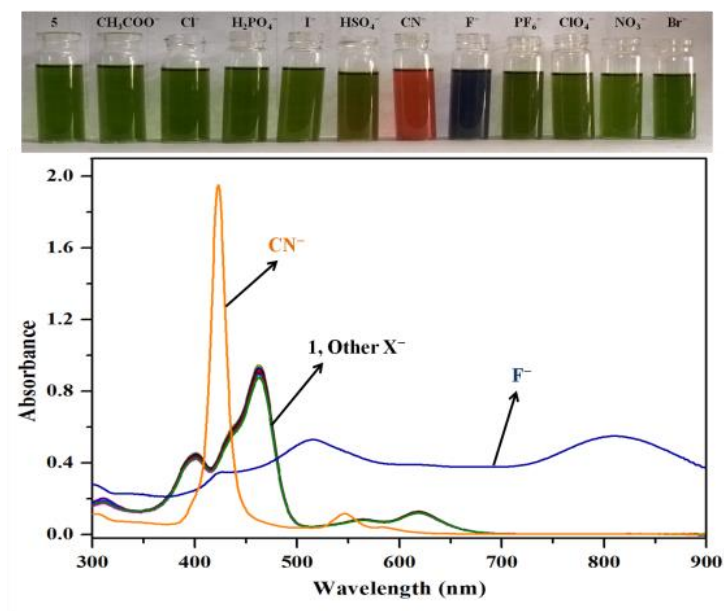

**Figure S20.** Absorption spectra and colorimetric changes for Cu-TDtBHPP-MN (**1**) (8  $\mu\text{M}$ ) in the presence of different anions. Changes observed only for  $\text{F}^-$  and  $\text{CN}^-$  ions.

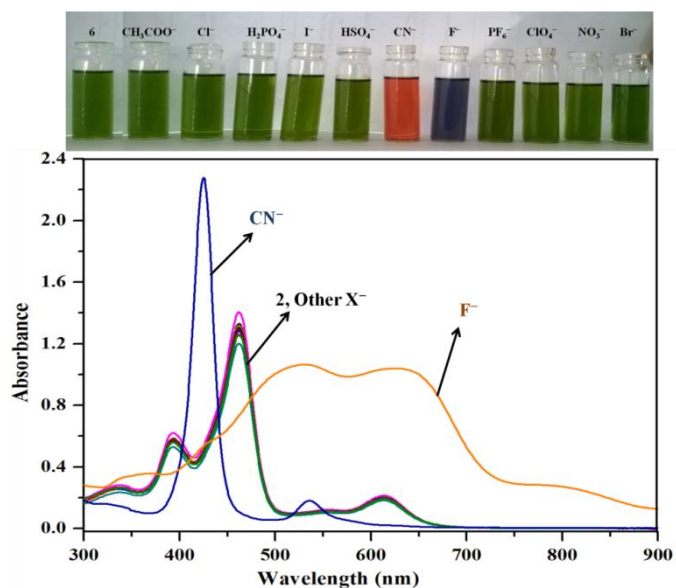

**Figure S21.** Absorption spectra and colorimetric changes for Ni-TDtBHPP-MN (**2**) (8  $\mu\text{M}$ ) in the presence of different anions. Changes observed only for  $\text{F}^-$  and  $\text{CN}^-$  ions.

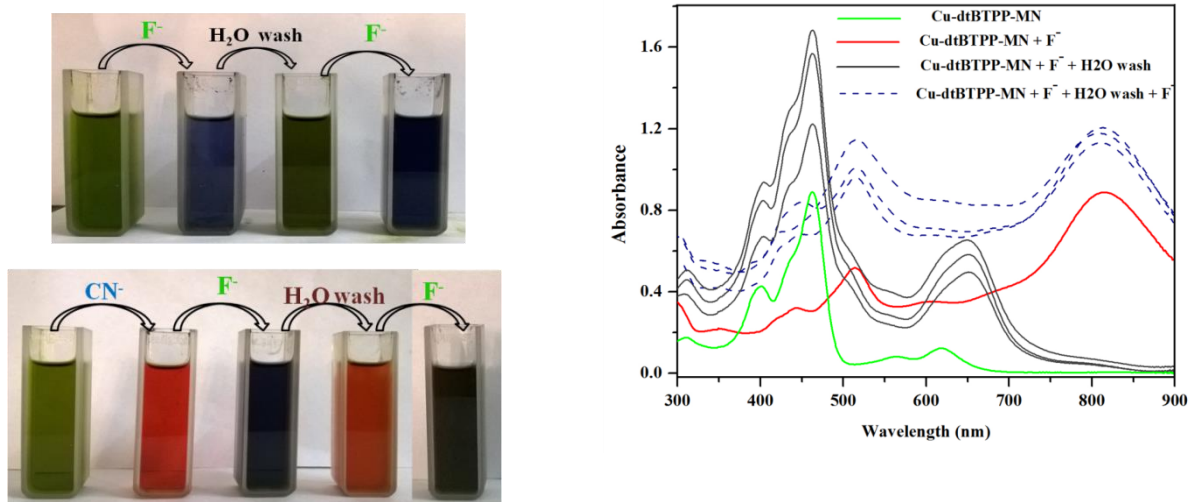

**Figure S22.** Visual response for reversibility for  $F^-$  ions (left) and UV/Vis response for reversibility for  $F^-$  ions in case of **1** (right) (metalloporphyrin spectrum regenerated with marginal shift in Qx(0,0) band).

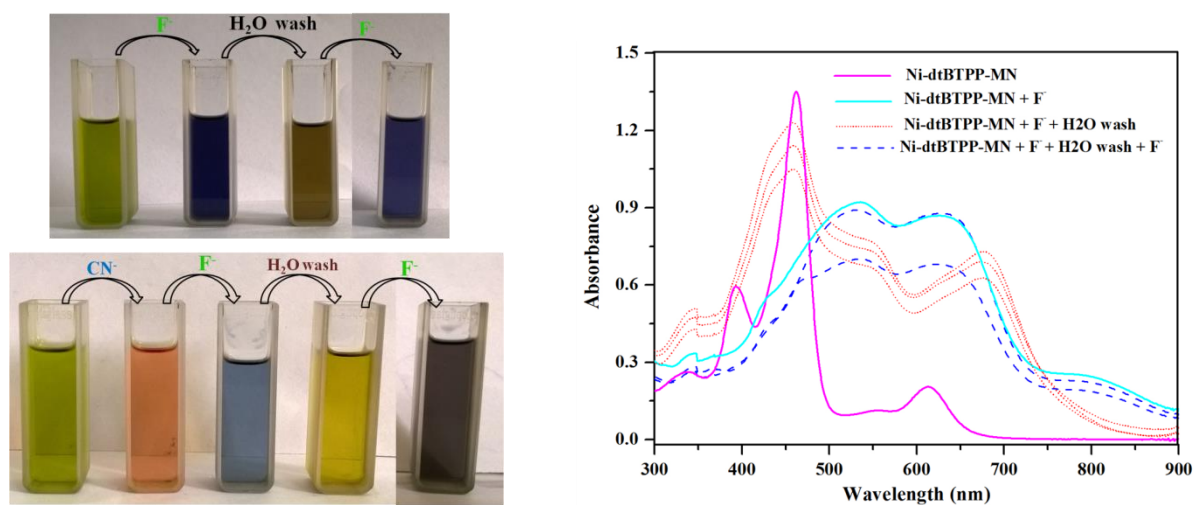

**Figure S23.** Visual response for reversibility for  $F^-$  ions (left) and UV/Vis response for reversibility for  $F^-$  ions in case of **2** (right) (distortion in Q bands are more probably due to autoxidation).



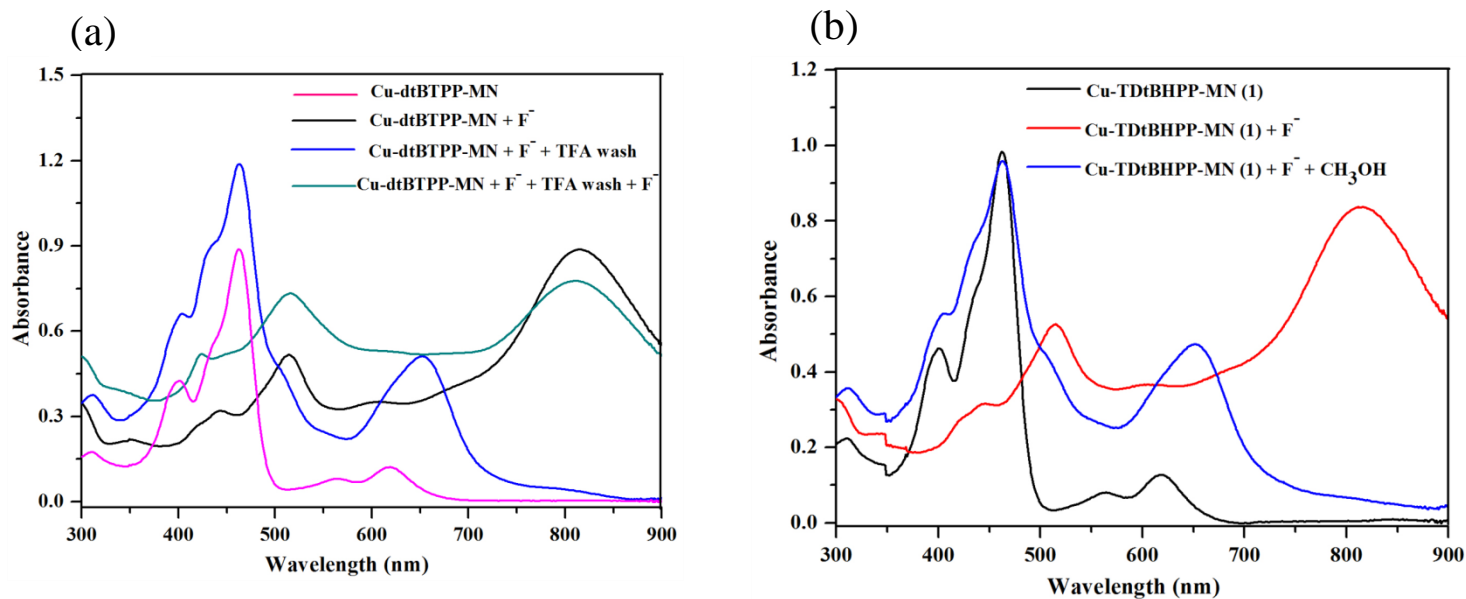

**Figure S24.** (a) UV/Vis response for reversibility for  $F^-$  ions using trifluoroacetic acid (TFA) in case of Cu-TDtBHPP-MN (1). (b) UV/Vis response for reversibility for  $F^-$  ions using  $CH_3OH$  in case of Cu-TDtBHPP-MN (1).

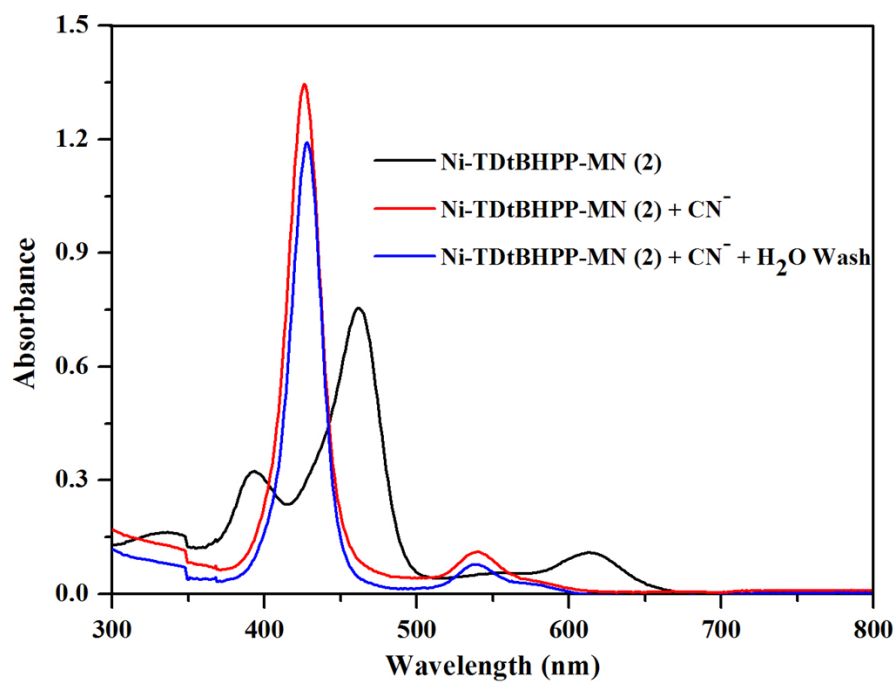

**Figure S25.** Effect of water on anionic porphyrin formed after the addition of cyanide ions to Ni-TDtBHPP-MN (2).

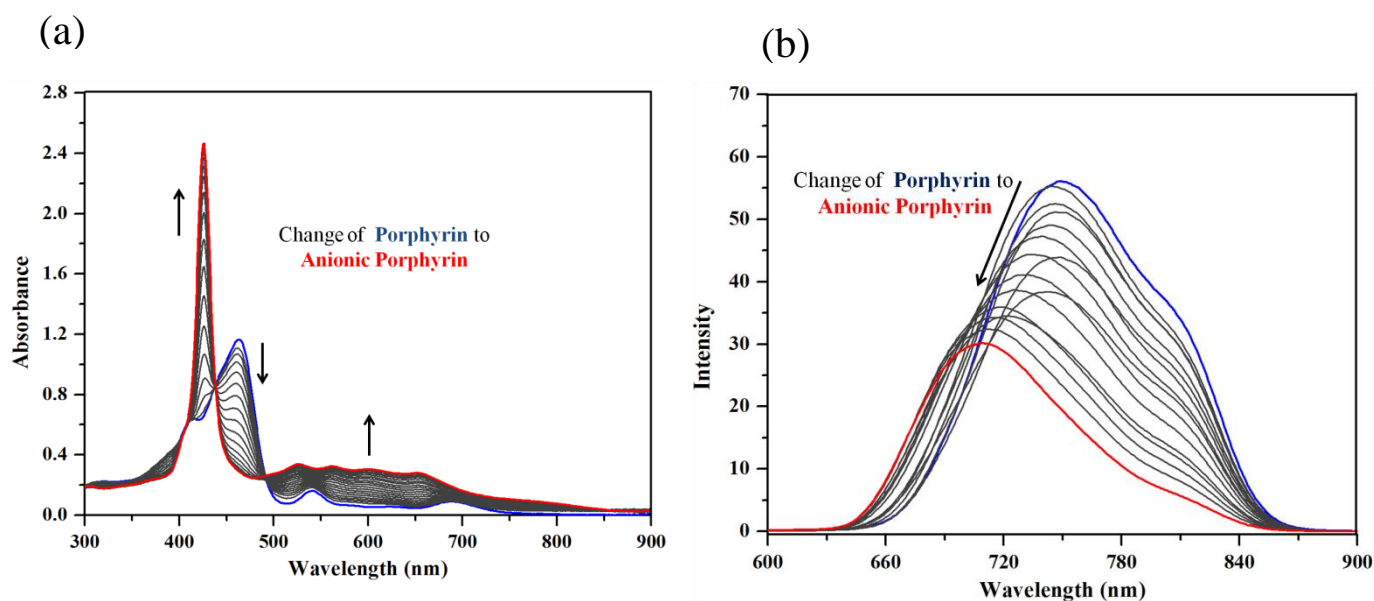

**Figure S26.** (a) Electronic absorbance changes upon addition of  $\text{CN}^-$  ( $0-2.5 \times 10^{-4} \text{M}$ ) (b) Fluorescence emission intensity changes upon addition of  $\text{CN}^-$  ( $0-2 \times 10^{-4} \text{M}$ ) into **3** in  $\text{CH}_2\text{Cl}_2$  (conversion of porphyrin to anionic porphyrin).

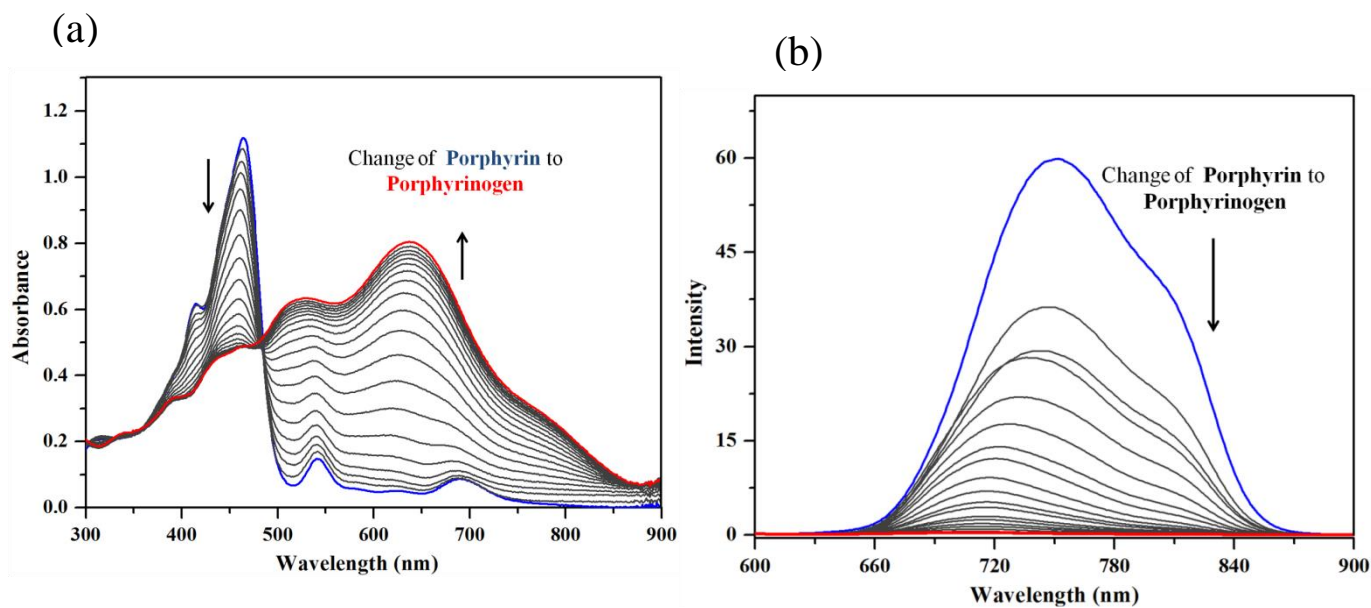

**Figure S27.** (a) Electronic absorbance changes upon addition of  $\text{F}^-$  ( $0-9.5 \times 10^{-4} \text{M}$ ) and (b) fluorescence emission intensity changes upon addition of  $\text{F}^-$  ( $0-8.5 \times 10^{-4} \text{M}$ ) into **3** in  $\text{CH}_2\text{Cl}_2$  (conversion of porphyrin to porphyrinogen).

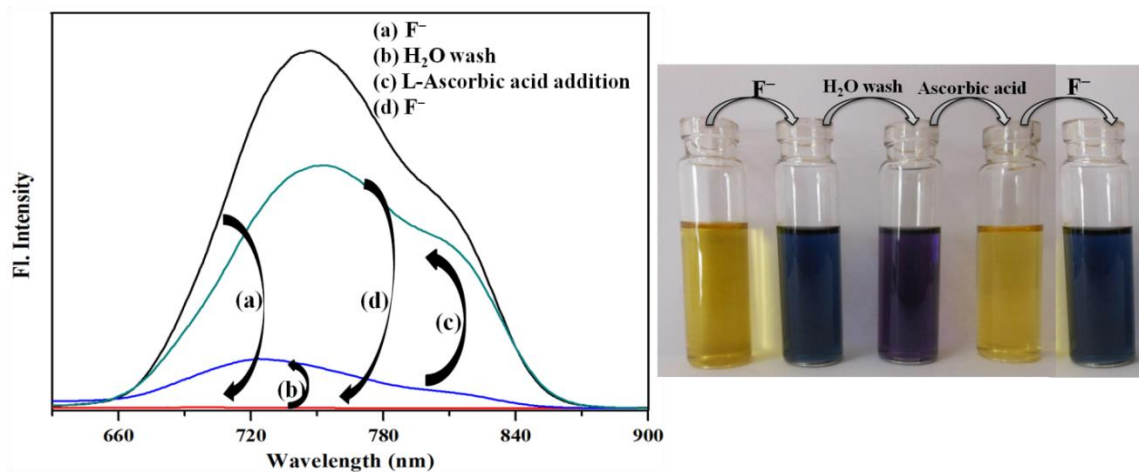

**Figure S28.** Fluorescence emission intensity changes of **3** for reversibility and reusability tests with  $F^-$  ions (left) and their corresponding colorimetric response (right).

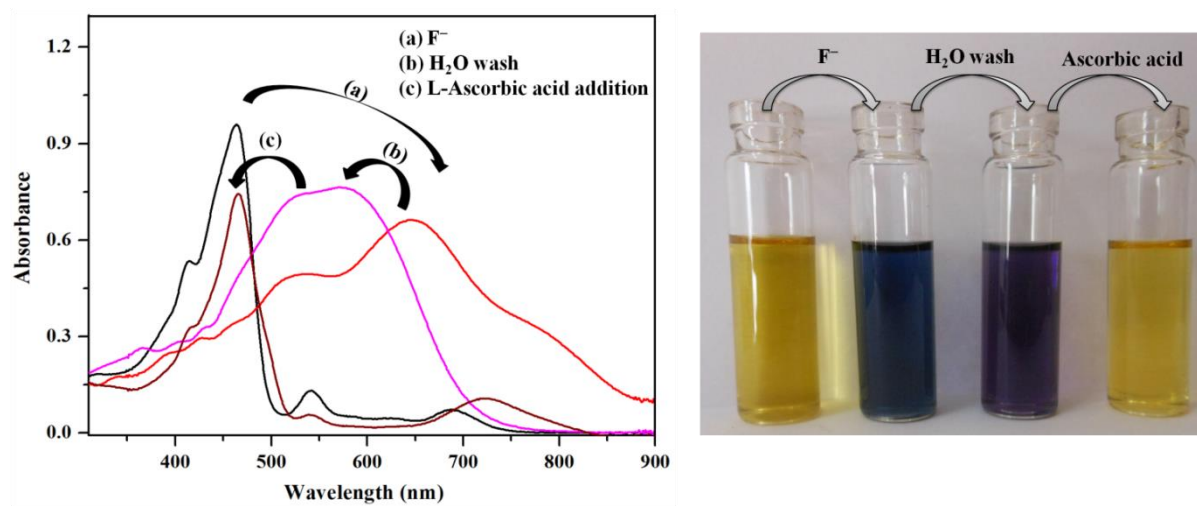

**Figure S29.** UV-Visible spectral changes of **3** for reversibility and reusability tests with  $F^-$  ions (left) and their corresponding colorimetric response (right).

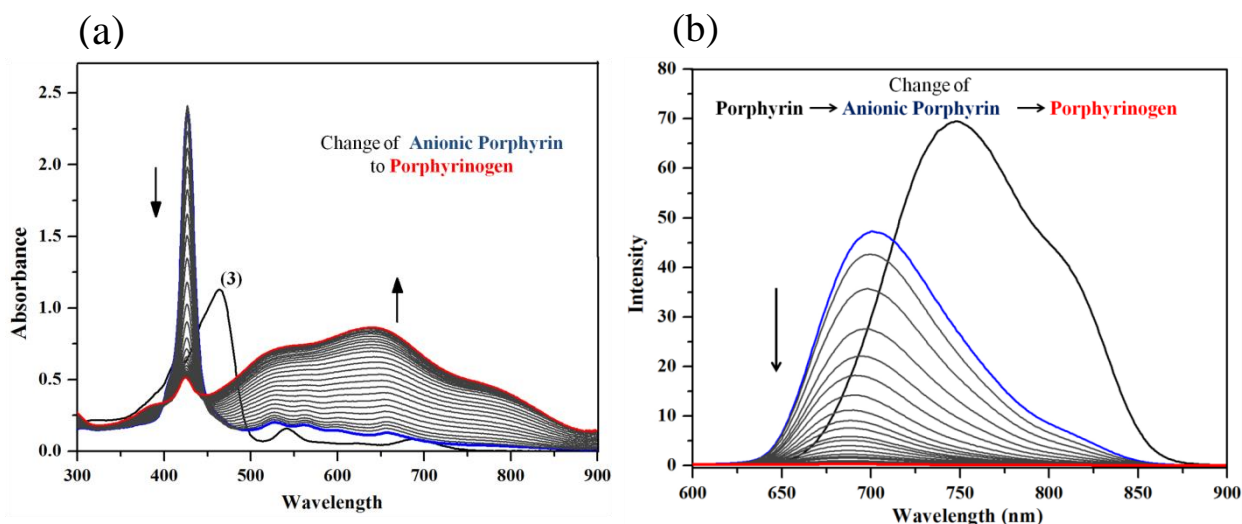

**Figure S30.** (a) Electronic absorbance changes of **5** upon addition of  $F^-$  ( $0-2.5 \times 10^{-3} M$ ) and (b) Fluorescence emission intensity changes upon addition of  $F^-$  ( $0-2 \times 10^{-3} M$ ) into **5** in  $CH_2Cl_2$  (conversion of anionic porphyrin to anionic porphyrinogen).

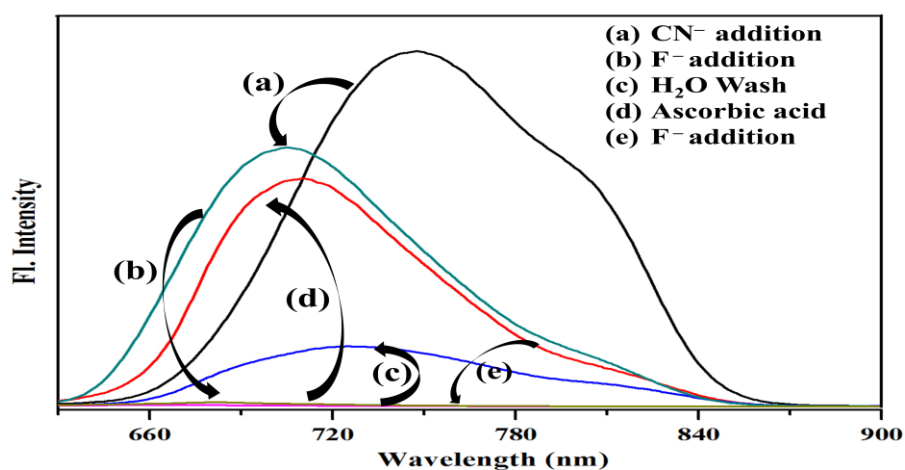

**Figure S31.** Fluorescence emission intensity changes of **5** with  $F^-$  ion.

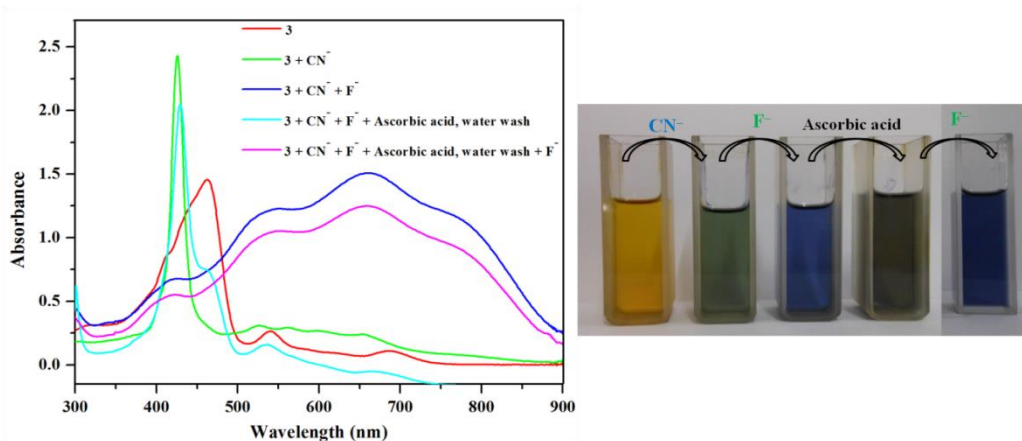

**Figure S32.** UV-Visible spectral changes of **5** for reversibility and reusability tests with  $F^-$  ions using L-ascorbic acid (left) and their corresponding colorimetric response (right).

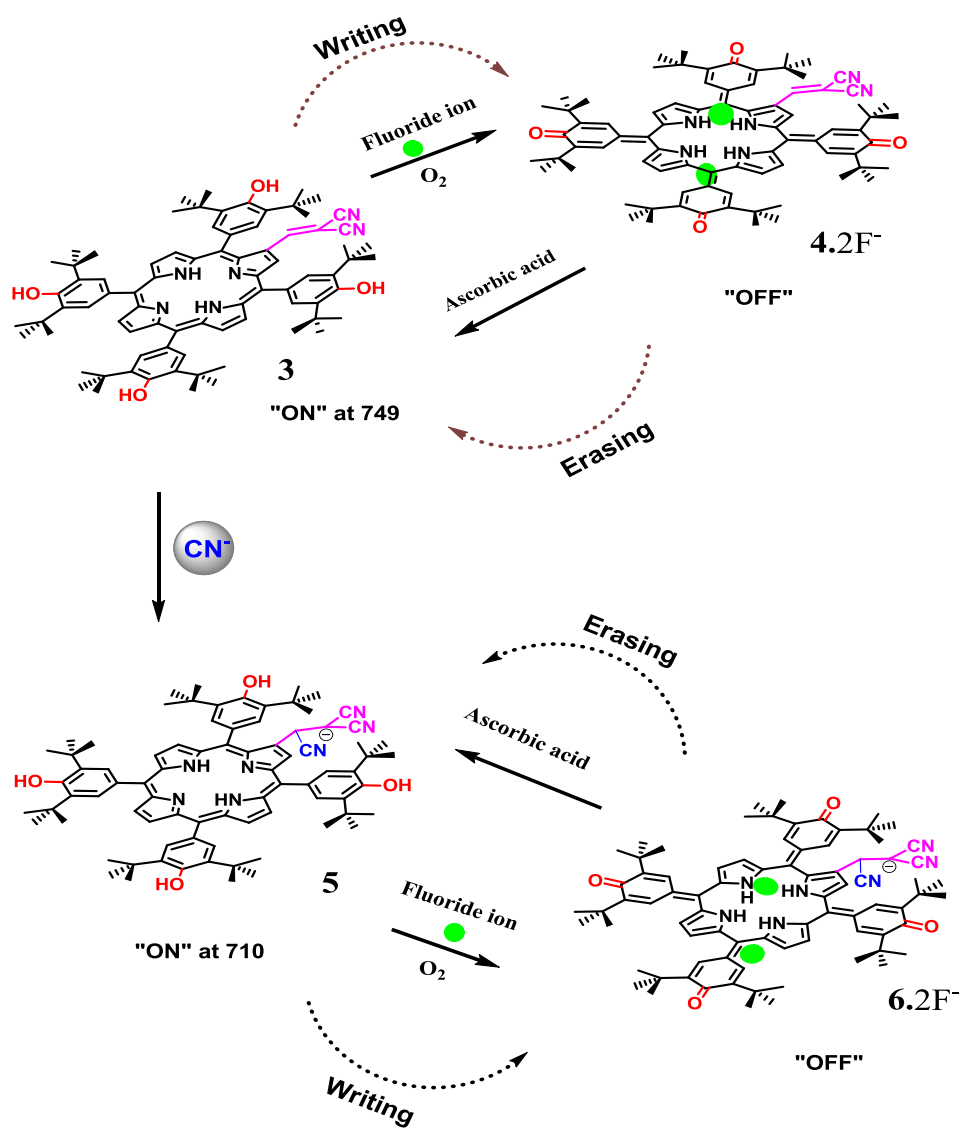

**Figure S33.** The "writing-erasing" cycle of **3** and **5**.

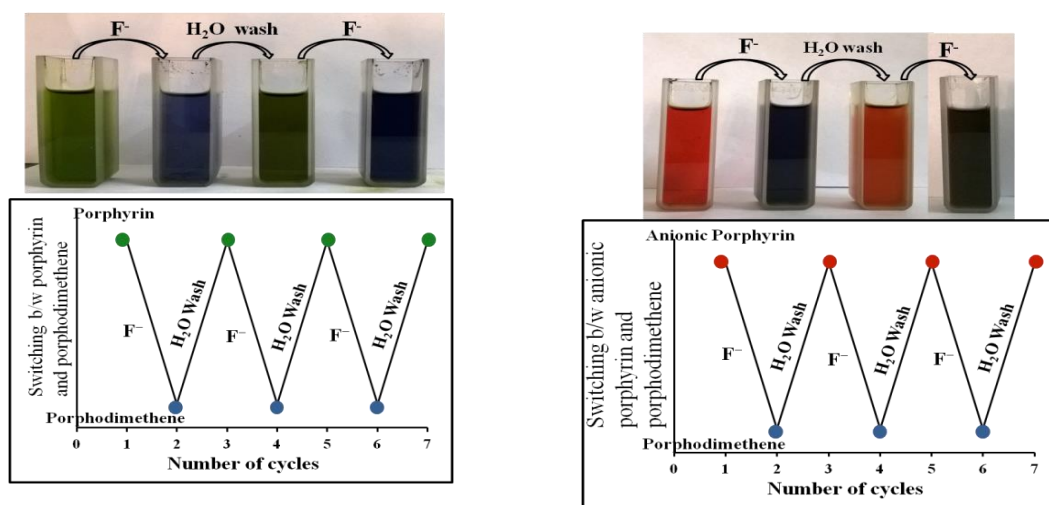

**Figure S34.** Repeated memory cycles using **1A** (left) and **1B** (right) in which one state was detected by the absorbance for porphyrin and other state by the absorbance for porphodimethene in  $CH_2Cl_2$  for Cu-TDtBHPP-MN (**1**). Photographs showed the colour of each state under ‘naked-eye’.

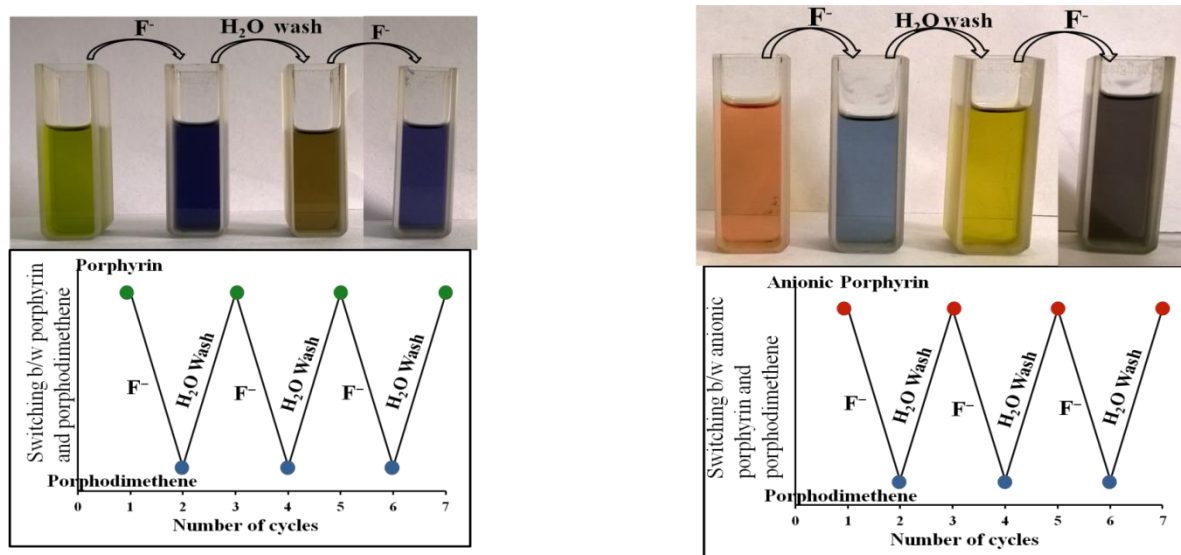

**Figure S35.** Repeated memory cycles using **1A** (left) and **1B** (right) in which one state was detected by the absorbance for porphyrin and other state by the absorbance for porphodimethene in  $CH_2Cl_2$  for Ni-TDtBHPP-MN (**2**). Photographs showed the colour of each state under ‘naked-eye’.



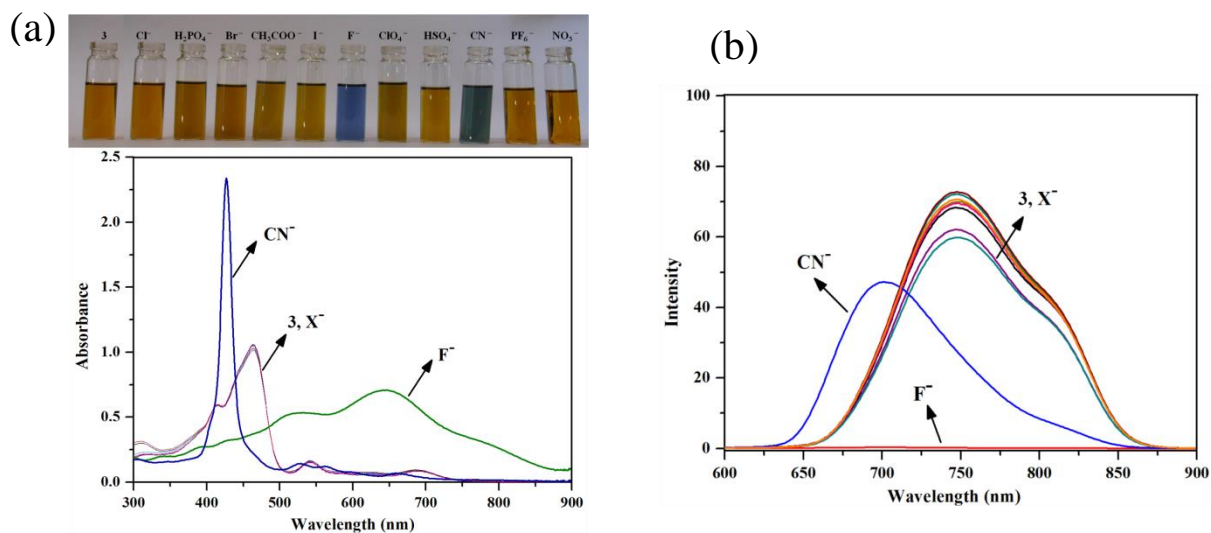

**Figure S36.** (a) Electronic absorbance and (b) fluorescence emission intensity changes upon addition of 10 equivalents of different tetra-*n*-butylammonium salts into  $\text{CH}_2\text{Cl}_2$  solution of **3**.

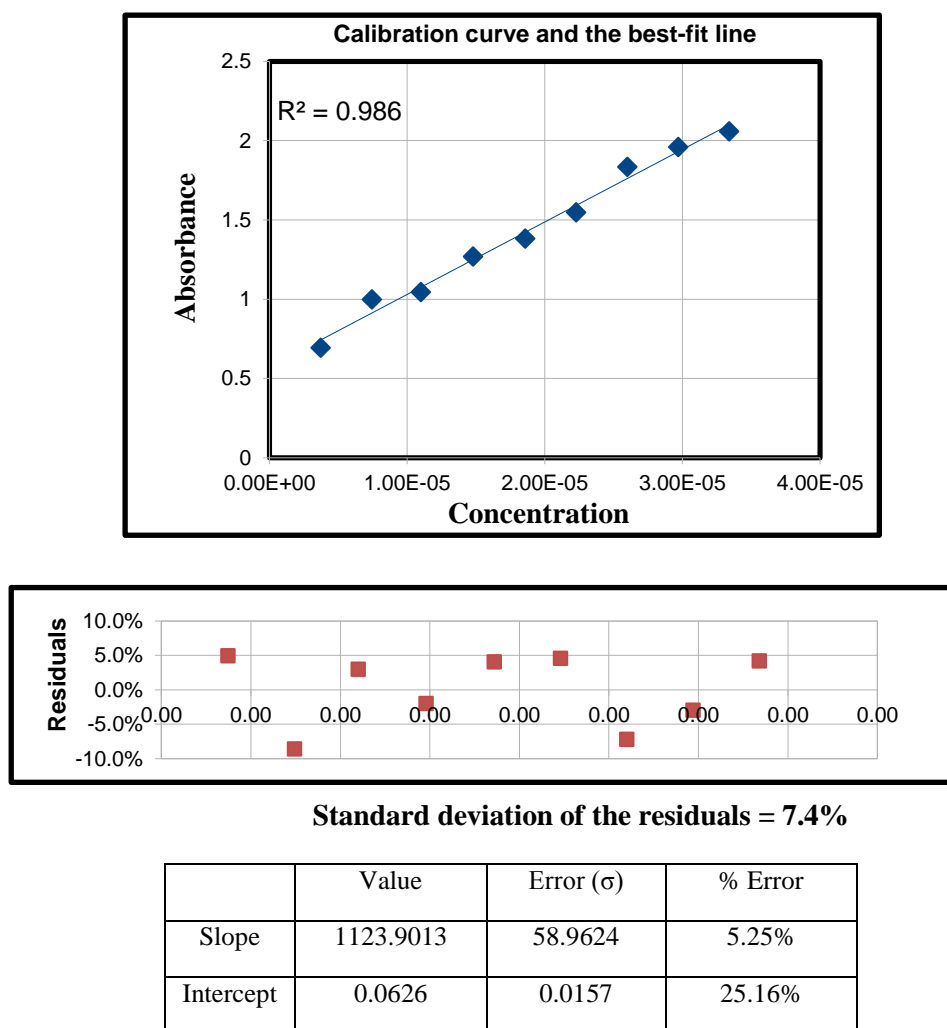

**Figure S37.** Analytical calibration curve using a simple linear curve fit, with error estimation of Cu-TD**1**HPP-MN (**1**) for fluoride addition.

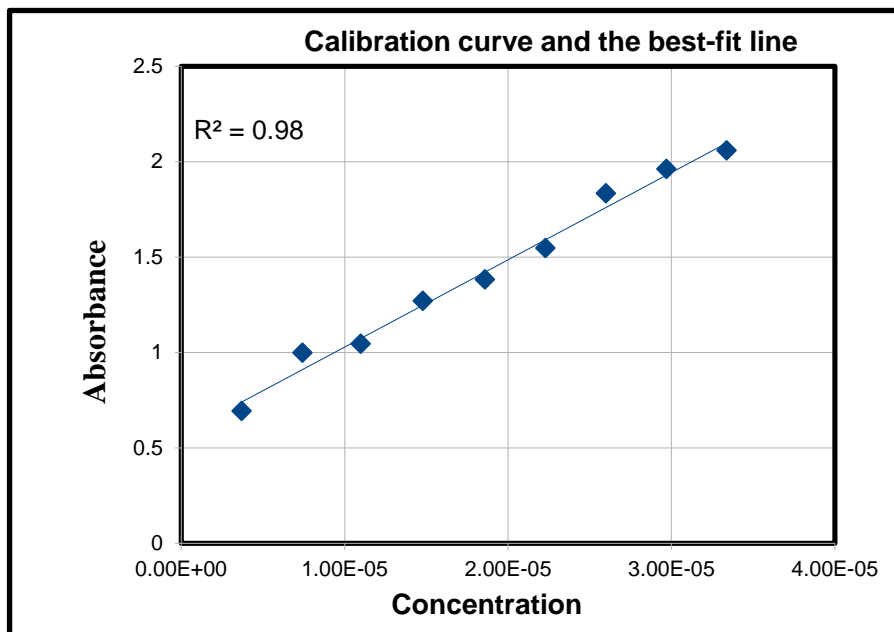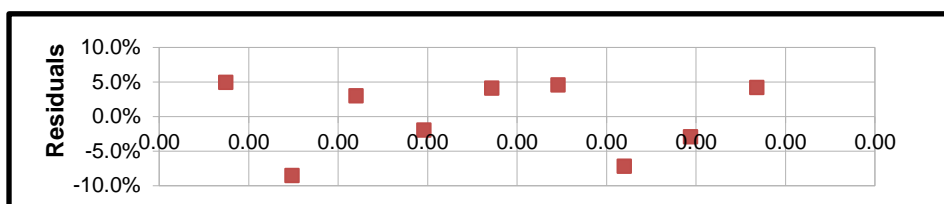

**Standard deviation of the residuals = 6.7%**

|           | Value      | Error ( $\sigma$ ) | % Error |
|-----------|------------|--------------------|---------|
| Slope     | 66352.4460 | 3134.4887          | 4.72%   |
| Intercept | 0.3526     | 0.0655             | 18.57%  |

**Figure S38.** Analytical calibration curve using a simple linear curve fit, with error estimation of Cu-TDtBHPP-MN (1) for cyanide addition.



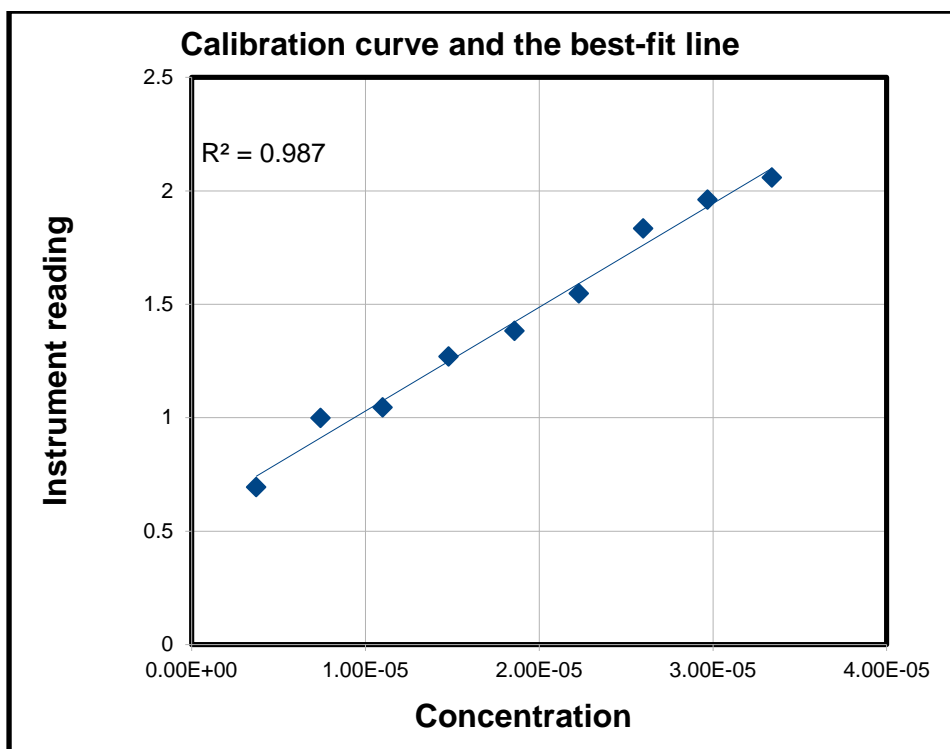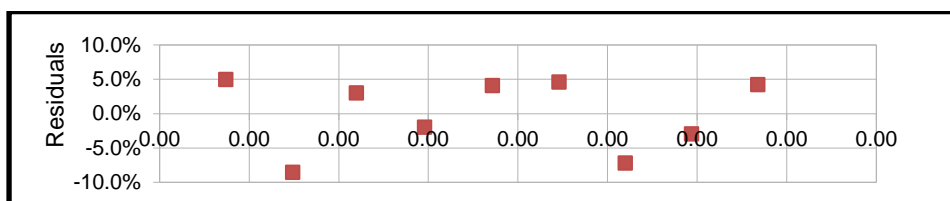

**Standard deviation of the residuals = 4.8%**

|           | Value      | Error ( $\sigma$ ) | % Error |
|-----------|------------|--------------------|---------|
| Slope     | 45748.3802 | 1974.8304          | 4.32%   |
| Intercept | 0.5720     | 0.0412             | 7.21%   |

**Figure S39.** Analytical calibration curve using a simple liner curve fit, with error estimation of H<sub>2</sub>-TDtBHPP-MN (**3**) for cyanide addition.

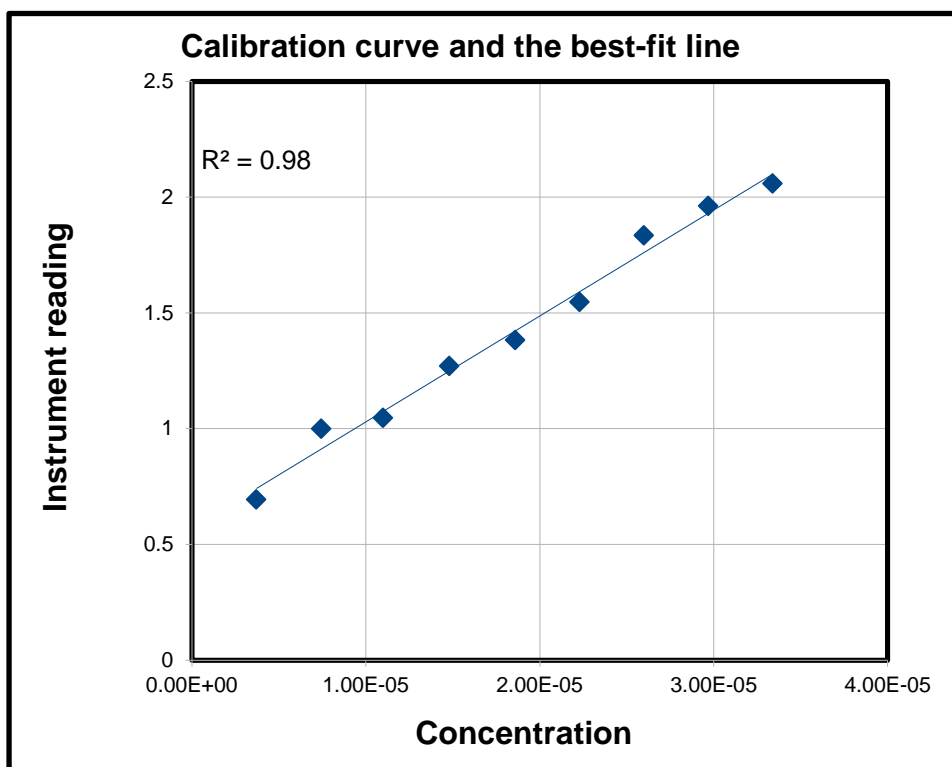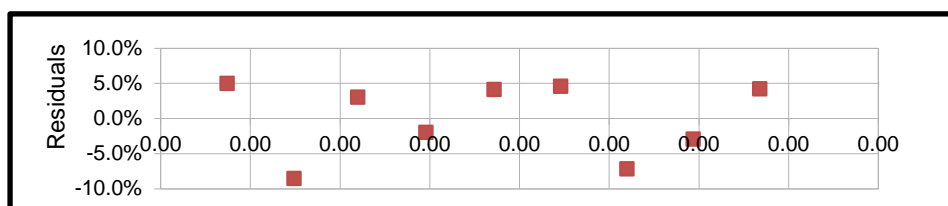

**Standard deviation of the residuals = 13.5%**

|           | Value     | Error ( $\sigma$ ) | % Error |
|-----------|-----------|--------------------|---------|
| Slope     | 2882.8421 | 178.9241           | 6.21%   |
| Intercept | 0.0257    | 0.0143             | 55.42%  |

**Figure S40.** Analytical calibration curve using a simple linear curve fit, with error estimation of H<sub>2</sub>-TDtBHPP-MN (**3**) for fluoride addition.

**Table S4.** B3LYP/LANL2DZ calculated parameters for the investigated porphyrin and porphyrinogens for **3**.

| compound                                                                               | HOMO+1<br>(eV) | HOMO<br>(eV) | LUMO<br>(eV) | LUMO+1<br>(eV) | HOMO-LUMO<br>gap (eV) |
|----------------------------------------------------------------------------------------|----------------|--------------|--------------|----------------|-----------------------|
| H <sub>2</sub> -TDtBHPP                                                                | -5.932         | -4.838       | -2.285       | -2.236         | 2.553                 |
| H <sub>2</sub> -TDtBHPP-<br>MN( <b>3</b> )                                             | -5.708         | -5.1209      | -3.019       | -2.563         | 2.1019                |
| H <sub>2</sub> -TDtBHPP-<br>MN+ CN <sup>-</sup> ( <b>5</b> )                           | -3.2106        | -1.977       | -0.595       | -0.565         | 1.382                 |
| H <sub>2</sub> -TDtBHPP-<br>MN+F <sup>-</sup> ( <b>4.F</b> )                           | -1.665         | -1.521       | 0.467        | 0.558          | 1.988                 |
| H <sub>2</sub> -TDtBHPP-<br>MN+ F <sup>-</sup> + H <sub>2</sub> O<br>Wash ( <b>4</b> ) | -6.153         | -5.865       | -3.909       | -3.555         | 1.956                 |

**Table S5.** B3LYP/LANL2DZ calculated parameters for the investigated porphyrin and porphodimethene for **2**.

| compound                           | HOMO+1<br>(eV) | HOMO<br>(eV) | LUMO<br>(eV) | LUMO+1<br>(eV) | HOMO-LUMO<br>gap (eV) |
|------------------------------------|----------------|--------------|--------------|----------------|-----------------------|
| Ni-TDtBHPP-<br>CHO                 | -5.427         | -5.029       | -2.534       | -2.309         | 2.495                 |
| Ni-TDtBHPP-<br>MN( <b>2</b> )      | -5.614         | -5.225       | -2.952       | -2.467         | 2.273                 |
| Ni-TDtBHPP-MN<br>+ CN <sup>-</sup> | -3.292         | -1.852       | -0.4291      | -0.3782        | 1.423                 |
| Ni-TDtBHPP-MN<br>+ F <sup>-</sup>  | -6.026         | -5.235       | -4.227       | -3.3217        | 1.008                 |

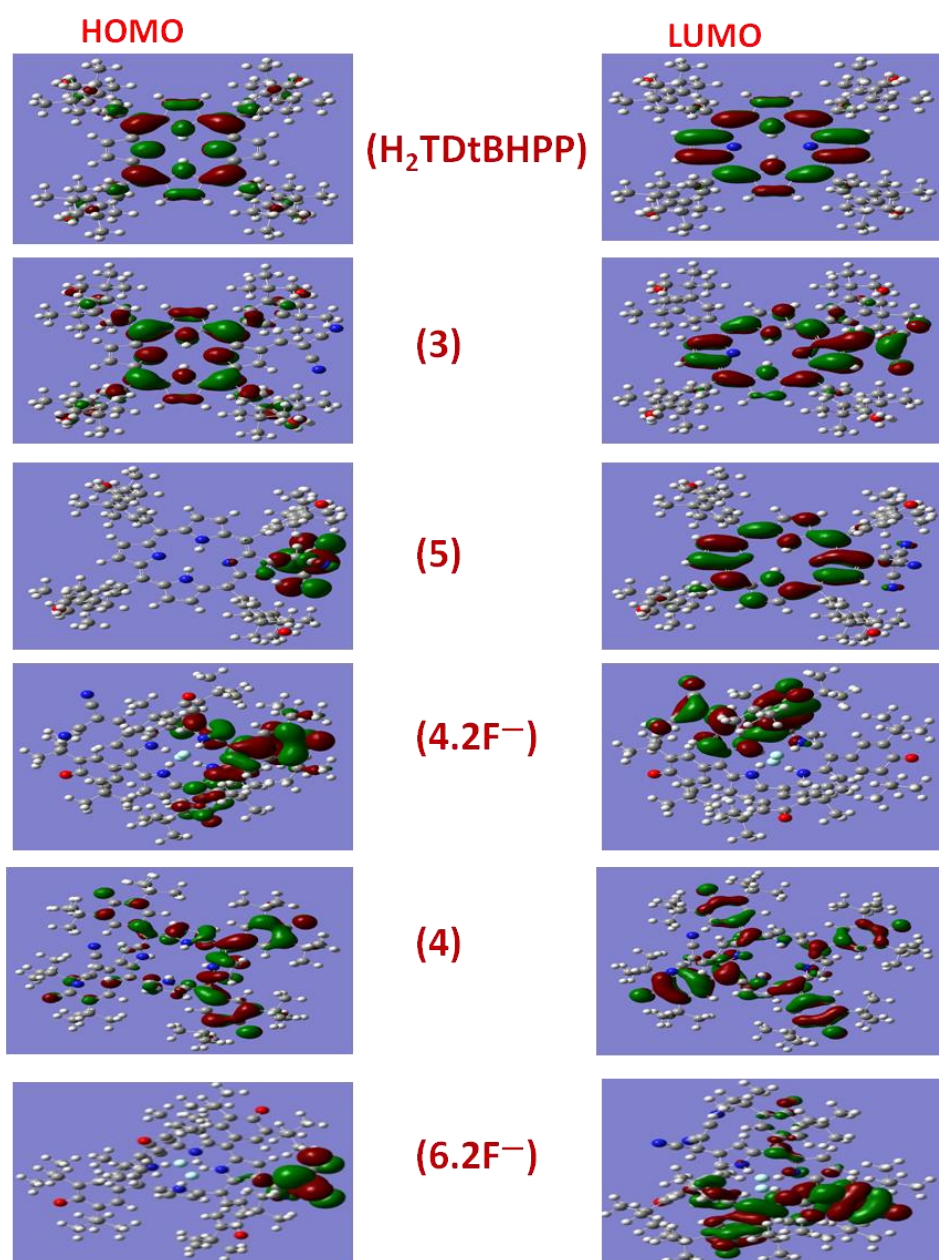

**Figure S41.** Coefficients of the first HOMO and the first LUMO for the optimized H<sub>2</sub>-TDtBHPP, **3**, **5**, **4.2F<sup>-</sup>**, **4** and **6.2F<sup>-</sup>**.

**Table S6.** Tunable two-input/multi-output system for **1** using  $\text{CN}^-$  and  $\text{F}^-$  as inputs.

| Memory element               |                             | $\lambda_{\text{max}}$<br>423 nm | $\lambda_{\text{max}}$<br>462 nm | $\lambda_{\text{max}}$<br>785 nm |
|------------------------------|-----------------------------|----------------------------------|----------------------------------|----------------------------------|
| INPUT 1<br>( $\text{CN}^-$ ) | INPUT 2<br>( $\text{F}^-$ ) |                                  |                                  |                                  |
| 0                            | 0                           | “0”                              | “1”                              | “0”                              |
| 1                            | 0                           | “1”                              | “0”                              | “0”                              |
| 0                            | 1                           | “0”                              | “0”                              | “1”                              |
| 1                            | 1                           | “0”                              | “0”                              | “1”                              |

**Table S7.** Tunable two-input/multi-output system for **2** using  $\text{CN}^-$  and  $\text{F}^-$  as inputs.

| Memory element               |                             | $\lambda_{\text{max}}$<br>426 nm | $\lambda_{\text{max}}$<br>462 nm | $\lambda_{\text{max}}$<br>532 nm |
|------------------------------|-----------------------------|----------------------------------|----------------------------------|----------------------------------|
| INPUT 1<br>( $\text{CN}^-$ ) | INPUT 2<br>( $\text{F}^-$ ) |                                  |                                  |                                  |
| 0                            | 0                           | “0”                              | “1”                              | “0”                              |
| 1                            | 0                           | “1”                              | “0”                              | “0”                              |
| 0                            | 1                           | “0”                              | “0”                              | “1”                              |
| 1                            | 1                           | “0”                              | “0”                              | “1”                              |
